# Supplementary material
Source: publisher figshare collection journal article supplement (https://sage.figshare.com/ndownloader/files/17823041)
Supplement: Supplementary file 1 [file 17823041]

## Sheet: IF16vsAL_all.GOenrich.signi
Category	ID	Description	GeneRatio	BgRatio	pvalue	padj	geneID	Count
BP	GO:0008202	steroid metabolic process	56/1014	253/20432	1.33103e-21	6.20395e-18	Cyp51/Lipe/Cyp17a1/Por/Mvd/Abca1/Hsd11b1/Srebf1/Nr1d1/Stat5b/Fdft1/Hmgcr/Sqle/Srebf2/App/Cyp39a1/Stard4/Lipa/Acadl/Hsd17b7/Abca2/Hsd17b12/Bmp2/Slc27a2/Pmvk/Rorc/Sult1b1/Hsd17b11/Slco1a4/Slc27a5/Cyp2b10/Sult1a1/Nsdhl/Fgfr1/Msmo1/Hsd17b2/Sc5d/Apoa5/Ldlr/Lss/Cebpa/Fgf1/Akr1d1/Bmp6/Atp8b1/Serpina12/Mvk/Pcsk9/Insig1/Apof/Lepr/Dhcr7/Fdps/G6pc/Gm6614/Hmgcs1	56
BP	GO:0044283	small molecule biosynthetic process	69/1014	421/20432	1.2598e-18	2.93595e-15	Kat2b/Srr/Cyp51/Por/Elovl1/Mvd/Mid1ip1/Pdk4/Cry1/Avpr1a/Srebf1/Nr1d1/Acly/Fdft1/Hmgcr/Dhfr/Ppara/Cyp39a1/Cbs/Stard4/Fads3/Rbp4/Gsto1/Fasn/Acadl/Agxt/Slc45a3/Atf3/Hsd17b7/Kynu/Sord/Bmp2/Slc27a2/Ahcy/Pmvk/Cth/Sesn2/Pgd/Mthfr/Mthfd2l/Prkab1/Asns/Slc27a5/Acer3/Nsdhl/Msmo1/Sc5d/Apoa5/Lss/Fgf1/Decr2/Akr1d1/Bmp6/Serpina12/Gck/Mvk/Acacb/Fads6/Insig1/Agmo/Lepr/Dhcr7/Ptk2b/Fdps/Mlycd/Bhmt/G6pc/Mup1/Hmgcs1	69
BP	GO:0016125	sterol metabolic process	35/1014	121/20432	6.75458e-18	1.04944e-14	Cyp51/Lipe/Por/Mvd/Abca1/Srebf1/Fdft1/Hmgcr/Sqle/Srebf2/App/Cyp39a1/Lipa/Acadl/Hsd17b7/Abca2/Pmvk/Nsdhl/Msmo1/Sc5d/Apoa5/Ldlr/Lss/Cebpa/Fgf1/Akr1d1/Serpina12/Mvk/Pcsk9/Insig1/Apof/Lepr/Dhcr7/Fdps/Hmgcs1	35
BP	GO:1902652	secondary alcohol metabolic process	34/1014	118/20432	2.29016e-17	2.66861e-14	Cyp51/Lipe/Por/Mvd/Abca1/Srebf1/Fdft1/Hmgcr/Sqle/Srebf2/App/Cyp39a1/Acadl/Hsd17b7/Abca2/Pmvk/Nsdhl/Fgfr1/Sc5d/Apoa5/Ldlr/Lss/Cebpa/Fgf1/Akr1d1/Serpina12/Mvk/Pcsk9/Insig1/Apof/Lepr/Dhcr7/Fdps/Hmgcs1	34
BP	GO:0008203	cholesterol metabolic process	33/1014	114/20432	5.80129e-17	5.40796e-14	Cyp51/Lipe/Por/Mvd/Abca1/Srebf1/Fdft1/Hmgcr/Sqle/Srebf2/App/Cyp39a1/Acadl/Hsd17b7/Abca2/Pmvk/Nsdhl/Sc5d/Apoa5/Ldlr/Lss/Cebpa/Fgf1/Akr1d1/Serpina12/Mvk/Pcsk9/Insig1/Apof/Lepr/Dhcr7/Fdps/Hmgcs1	33
BP	GO:0008610	lipid biosynthetic process	70/1014	497/20432	2.5007e-15	1.94263e-12	Cyp51/Cyp17a1/Por/Elovl1/Mvd/Mid1ip1/Kdsr/Plin5/St3gal1/Hsd11b1/Pdk4/Avpr1a/Srebf1/Nr1d1/Acly/Fdft1/Gpld1/Hmgcr/Plpp1/St3gal6/Pigx/Cyp39a1/Stard4/Fads3/Fasn/Pi4k2a/Abhd6/Pdgfa/Acadl/Slc45a3/Hsd17b7/Hsd17b12/Crls1/Bmp2/Slc27a2/Lpin3/Pmvk/St3gal3/Hsd17b11/Prkab1/Atg7/Slc27a5/Cdipt/Acer3/Nsdhl/Msmo1/Hsd17b2/Sc5d/St3gal4/Apoa5/Ldlr/Lss/Fgf1/Decr2/Akr1d1/Bmp6/Serpina12/Pnpla3/Mvk/Acacb/Fads6/Insig1/Ag…	70
BP	GO:0006066	alcohol metabolic process	45/1014	234/20432	3.57064e-15	2.37754e-12	Cyp51/Lipe/Por/Mvd/Abca1/Srebf1/Galk1/Fdft1/Hmgcr/Plpp1/Sqle/Srebf2/App/Synj2/Cyp39a1/Impa2/Rbp4/Acadl/Hsd17b7/Abca2/Sord/Itpka/Pmvk/Acer3/Nsdhl/Fgfr1/Sc5d/Apoa5/Ldlr/Lss/Cebpa/Fgf1/Akr1d1/Serpina12/Mvk/Grk3/Pcsk9/Insig1/Apof/Retsat/Lepr/Dhcr7/Ptk2b/Fdps/Hmgcs1	45
BP	GO:1901615	organic hydroxy compound metabolic process	55/1014	358/20432	7.11635e-14	4.14616e-11	Cyp51/Ddt/Lipe/Por/Mvd/Abca1/Srebf1/Galk1/Fdft1/Hmgcr/Plpp1/Sqle/Srebf2/App/Synj2/Cyp39a1/Impa2/Lipa/Rbp4/Acadl/Hsd17b7/Nr4a2/Abca2/Sord/Itpka/Bmp2/Pmvk/Sult1b1/Sult1d1/Sult1a1/Acer3/Nsdhl/Fgfr1/Msmo1/Sc5d/Apoa5/Ldlr/Lss/Cebpa/Fgf1/Akr1d1/Bmp6/Serpina12/Mvk/Grk3/Pcsk9/Insig1/Apof/Retsat/Lepr/Dhcr7/Ptk2b/Fdps/Cyp2d22/Hmgcs1	55
BP	GO:0006732	coenzyme metabolic process	47/1014	275/20432	8.98045e-14	4.65087e-11	Cs/Mvd/Hsd11b1/Pdk4/Vnn3/Nampt/Galk1/Acly/Acot12/Hmgcr/Dhfr/Nadk2/Ppara/Ehhadh/Fasn/Taldo1/Mpc2/Kynu/Ahcy/Pmvk/Vcp/Gale/Pgd/Mthfr/Mthfd2l/Ahcyl2/Idh2/Qprt/Nudt7/Nmnat3/Acot11/Galt/Fmo2/Fmo1/Gck/Mvk/Acacb/Acot4/Mat2a/Ces1d/Trp53/Mocs1/Mthfs/Acnat1/Acot1/Ggh/Mlycd	47
BP	GO:0006694	steroid biosynthetic process	32/1014	137/20432	1.33505e-13	6.22266e-11	Cyp51/Cyp17a1/Por/Mvd/Hsd11b1/Srebf1/Nr1d1/Fdft1/Hmgcr/Cyp39a1/Stard4/Hsd17b7/Hsd17b12/Bmp2/Slc27a2/Pmvk/Hsd17b11/Slc27a5/Nsdhl/Msmo1/Hsd17b2/Sc5d/Apoa5/Lss/Fgf1/Akr1d1/Bmp6/Mvk/Insig1/Dhcr7/Fdps/Hmgcs1	32
BP	GO:0006790	sulfur compound metabolic process	45/1014	262/20432	2.53519e-13	1.07423e-10	Sp1/Cs/Mvd/Pdk4/Arsg/Acly/Stat5b/Acot12/Ehhadh/Cbs/Gsto1/Fasn/Mpc2/Kynu/Ahcy/Gstm4/Pmvk/Gclm/Cth/Extl1/Mthfr/Sult1b1/Sult1d1/Ahcyl2/Nat8/Nox4/Sult1a1/Nudt7/Fam96a/Acpp/Gstt2/Acot11/Ggt6/Mvk/Acacb/Pxylp1/Hs6st1/Acot4/Mat2a/Ces1d/Ethe1/Acnat1/Mpst/Acot1/Mlycd	45
BP	GO:0006695	cholesterol biosynthetic process	18/1014	42/20432	3.28349e-13	1.27536e-10	Cyp51/Por/Mvd/Srebf1/Fdft1/Hmgcr/Hsd17b7/Pmvk/Nsdhl/Sc5d/Apoa5/Lss/Fgf1/Mvk/Insig1/Dhcr7/Fdps/Hmgcs1	18
BP	GO:0016126	sterol biosynthetic process	19/1014	48/20432	4.11701e-13	1.47611e-10	Cyp51/Por/Mvd/Srebf1/Fdft1/Hmgcr/Hsd17b7/Pmvk/Nsdhl/Msmo1/Sc5d/Apoa5/Lss/Fgf1/Mvk/Insig1/Dhcr7/Fdps/Hmgcs1	19
BP	GO:1902653	secondary alcohol biosynthetic process	18/1014	43/20432	5.38715e-13	1.79354e-10	Cyp51/Por/Mvd/Srebf1/Fdft1/Hmgcr/Hsd17b7/Pmvk/Nsdhl/Sc5d/Apoa5/Lss/Fgf1/Mvk/Insig1/Dhcr7/Fdps/Hmgcs1	18
BP	GO:0051186	cofactor metabolic process	51/1014	337/20432	1.05731e-12	3.28542e-10	Cs/Mvd/Hsd11b1/Pdk4/Vnn3/Nampt/Galk1/Acly/Acot12/Hmgcr/Dhfr/Nadk2/Ppara/Ehhadh/Fasn/Taldo1/Mpc2/Kynu/Ahcy/Pmvk/Vcp/Gale/Pgd/Mthfr/Mthfd2l/Ahcyl2/Idh2/Qprt/Nudt7/Ireb2/Fam96a/Nmnat3/Acot11/Galt/Rsad1/Fmo2/Fmo1/Gck/Mvk/Acacb/Hebp1/Acot4/Mat2a/Ces1d/Trp53/Mocs1/Mthfs/Acnat1/Acot1/Ggh/Mlycd	51
BP	GO:0006631	fatty acid metabolic process	53/1014	362/20432	1.43275e-12	4.17377e-10	Lipe/Por/Elovl1/Cav1/Mid1ip1/Plin5/Pdk4/Avpr1a/Srebf1/Acly/Stat5b/Eci2/Acot12/Acox2/Hacl1/Ppara/Ehhadh/Acat2/Fads3/Lipa/Fasn/Acadl/Slc45a3/Slc27a2/Lpin3/Sesn2/Prkab1/Tnfrsf1a/Slc27a5/Cyp2b10/Msmo1/Sc5d/Apoa5/Etfa/Acot11/Decr2/Acacb/Cyp2c37/Fads6/Insig1/Agmo/Acot4/Cyp2c50/Ces1d/Cyp2d22/Cyp2c54/Cyp2d40/Acnat1/Acot1/Mlycd/Cyp2c68/Acsf2/Cyp2d10	53
MF	GO:0003735	structural constituent of ribosome	33/1012	174/20358	2.65564e-11	0.0360065	Rps11/Slc25a1/Rps9/Rps18/Rps5/Slc25a13/Slc25a22/Slc25a29/Slc25a48/Rps14/Slc25a45/Rps24/Rps20/Rpl22/Slc25a15/Slc25a20/Rps29/Rps16/Rpl10a/Rpl12/Rpl22l1/Rpl9/Rps8/Rps23/Slc25a44/Rpl32/Rps7/Rps12/Rpl35/Rps28/Rpl13a/Rpl39/Rps27	33
BP	GO:0019216	regulation of lipid metabolic process	44/1014	291/20432	3.96075e-11	1.08594e-08	Angptl4/Cyp17a1/Por/Cav1/Mid1ip1/Rarres2/Plin5/Pdk4/Fmc1/Avpr1a/Srebf1/Nr1d1/Stat5b/Gpld1/Ppara/Stard4/Abhd6/Pdgfa/Acadl/Slc45a3/Bmp2/Rorc/Atg7/Apoa5/Ldlr/Fgf1/Bmp6/Pik3r1/Serpina12/Acacb/Adora1/Prkce/Insig1/Hcar2/Angptl8/Opa3/Fgfr3/Adgrf5/Ces1g/Dhcr7/Ptk2b/Fdps/Mlycd/Mup1	44
CC	GO:0022626	cytosolic ribosome	25/1029	105/20678	4.25606e-11	0.0218488	Rps11/Rps9/Rps18/Rps5/Rps14/Rps24/Rps20/Rpl22/Rps29/Rps16/Rpl10a/Rpl12/Rpl22l1/Rpl9/Rps8/Rps23/Rpl32/Rpl32l/Rps7/Rps12/Rpl35/Rps28/Rpl13a/Rpl39/Rps27	25
BP	GO:0046394	carboxylic acid biosynthetic process	37/1014	225/20432	1.24547e-10	2.20464e-08	Srr/Elovl1/Mid1ip1/Pdk4/Avpr1a/Srebf1/Nr1d1/Acly/Dhfr/Cyp39a1/Cbs/Stard4/Fads3/Gsto1/Fasn/Acadl/Agxt/Slc45a3/Kynu/Slc27a2/Cth/Mthfr/Mthfd2l/Prkab1/Asns/Slc27a5/Msmo1/Sc5d/Apoa5/Decr2/Akr1d1/Acacb/Fads6/Insig1/Agmo/Mlycd/Bhmt	37
CC	GO:0022627	cytosolic small ribosomal subunit	15/1029	39/20678	2.09716e-10	0.021905	Rps11/Rps9/Rps18/Rps5/Rps14/Rps24/Rps20/Rps29/Rps16/Rps8/Rps23/Rps7/Rps12/Rps28/Rps27	15
BP	GO:0016053	organic acid biosynthetic process	38/1014	241/20432	2.47603e-10	3.20536e-08	Srr/Elovl1/Mid1ip1/Pdk4/Avpr1a/Srebf1/Nr1d1/Acly/Dhfr/Cyp39a1/Cbs/Stard4/Fads3/Gsto1/Fasn/Acadl/Agxt/Slc45a3/Kynu/Slc27a2/Ahcy/Cth/Mthfr/Mthfd2l/Prkab1/Asns/Slc27a5/Msmo1/Sc5d/Apoa5/Decr2/Akr1d1/Acacb/Fads6/Insig1/Agmo/Mlycd/Bhmt	38
BP	GO:0006084	acetyl-CoA metabolic process	13/1014	29/20432	3.31875e-10	3.22508e-08	Cs/Mvd/Pdk4/Acly/Acot12/Fasn/Mpc2/Kynu/Pmvk/Nudt7/Mvk/Acacb/Mlycd	13
CC	GO:0044445	cytosolic part	35/1029	214/20678	4.9481e-10	0.0229112	Snapin/Psmc3/Rps11/Rps9/Rps18/Rps5/Psmc5/Rps14/Pi4k2a/Hps1/Rps24/Psmd14/Rps20/Casp9/Psmc2/Rpl22/Psmc4/Rps29/Rps16/Rpl10a/Rpl12/Rpl22l1/Rpl9/Rps8/Rps23/Ide/Rpl32/Rpl32l/Rps7/Rps12/Rpl35/Rps28/Rpl13a/Rpl39/Rps27	35
BP	GO:0006637	acyl-CoA metabolic process	19/1014	69/20432	6.1168e-10	5.43163e-08	Cs/Mvd/Pdk4/Acly/Acot12/Ehhadh/Fasn/Mpc2/Kynu/Pmvk/Nudt7/Acot11/Mvk/Acacb/Acot4/Ces1d/Acnat1/Acot1/Mlycd	19
BP	GO:0035383	thioester metabolic process	19/1014	69/20432	6.1168e-10	6.0741e-08	Cs/Mvd/Pdk4/Acly/Acot12/Ehhadh/Fasn/Mpc2/Kynu/Pmvk/Nudt7/Acot11/Mvk/Acacb/Acot4/Ces1d/Acnat1/Acot1/Mlycd	19
BP	GO:0046890	regulation of lipid biosynthetic process	26/1014	144/20432	9.57421e-09	7.73435e-08	Cyp17a1/Por/Mid1ip1/Plin5/Pdk4/Avpr1a/Srebf1/Nr1d1/Gpld1/Stard4/Abhd6/Pdgfa/Acadl/Slc45a3/Bmp2/Atg7/Apoa5/Ldlr/Fgf1/Bmp6/Serpina12/Insig1/Adgrf5/Dhcr7/Fdps/Mup1	26
BP	GO:0072330	monocarboxylic acid biosynthetic process	28/1014	168/20432	1.63477e-08	8.54372e-08	Srr/Elovl1/Mid1ip1/Pdk4/Avpr1a/Srebf1/Nr1d1/Acly/Cyp39a1/Stard4/Fads3/Fasn/Acadl/Agxt/Slc45a3/Slc27a2/Prkab1/Slc27a5/Msmo1/Sc5d/Apoa5/Decr2/Akr1d1/Acacb/Fads6/Insig1/Agmo/Mlycd	28
CC	GO:0044391	ribosomal subunit	27/1029	158/20678	1.8034e-08	0.0235714	Rps11/Rps9/Rps18/Rps5/Rps14/Rps24/Rps20/Rpl22/Rbm3/Rps29/Rps16/Rpl10a/Rpl12/Rpl22l1/Rpl9/Rps8/Rps23/Npm1/Rpl32/Rpl32l/Rps7/Rps12/Rpl35/Rps28/Rpl13a/Rpl39/Rps27	27
BP	GO:0046165	alcohol biosynthetic process	20/1014	93/20432	2.30239e-08	1.29593e-07	Cyp51/Por/Mvd/Srebf1/Fdft1/Hmgcr/Hsd17b7/Pmvk/Acer3/Nsdhl/Sc5d/Apoa5/Lss/Fgf1/Mvk/Insig1/Dhcr7/Ptk2b/Fdps/Hmgcs1	20
BP	GO:0005996	monosaccharide metabolic process	32/1014	219/20432	4.16091e-08	1.29593e-07	Kat2b/Pdk4/Cry1/Igfbp3/Galk1/Nr1d1/Gpld1/Ppara/Pmm2/Tff3/Rbp4/Igfbp5/Slc45a3/Atf3/Sord/Rorc/Gale/Sesn2/Pgd/Pgm2l1/Lcmt1/Galt/Pik3r1/Serpina12/Gck/Acacb/Angptl8/Lepr/Trp53/Mlycd/G6pc/Mup1	32
MF	GO:0004497	monooxygenase activity	24/1012	134/20358	4.27165e-08	0.0360065	Cyp51/Cyp17a1/Cmah/Sqle/Cyp39a1/Cyp2u1/Cyp4a31/Cyp4b1/Cyp2b10/Msmo1/Fmo2/Fmo1/Cyp2c37/Agmo/Cyp2c50/Cyp3a11/Cyp2d22/Cyp4a32/Cyp4a12a/Cyp2c54/Cyp2d40/Cyp2c68/Cyp4a12b/Cyp2d10	24
BP	GO:0019318	hexose metabolic process	31/1014	210/20432	5.31618e-08	1.94023e-06	Kat2b/Pdk4/Cry1/Igfbp3/Galk1/Nr1d1/Gpld1/Ppara/Pmm2/Tff3/Rbp4/Igfbp5/Slc45a3/Atf3/Sord/Rorc/Gale/Sesn2/Pgm2l1/Lcmt1/Galt/Pik3r1/Serpina12/Gck/Acacb/Angptl8/Lepr/Trp53/Mlycd/G6pc/Mup1	31
MF	GO:0016887	ATPase activity	47/1012	407/20358	7.03872e-08	0.036042	Psmc3/Hltf/Myo9b/Atp4a/Abca1/Clpx/Lonrf3/Atp5g3/Atp6v0a1/Psmc5/Wrnip1/Myh9/Eif4a2/Atp5c1/Xrcc5/Tor1b/Tor1a/Abca2/Abcb11/Atp9a/Atp6v0d2/Vcp/Psmc2/Abcb1b/Abcb8/Abcg2/Psmc4/Myh14/Atp11a/Nudt7/Smarca4/Ddx19b/Recql4/Ino80/Tap1/Atp11b/Atp5l/Atp8b1/Abcb1a/Ddx24/Abca8a/Abcb4/Nudt6/Ide/Atp8b4/Rnf213/Hspa1a	47
BP	GO:0045834	positive regulation of lipid metabolic process	24/1014	138/20432	7.42857e-08	2.3354e-06	Angptl4/Cyp17a1/Por/Mid1ip1/Plin5/Avpr1a/Srebf1/Nr1d1/Gpld1/Ppara/Stard4/Abhd6/Slc45a3/Apoa5/Ldlr/Fgf1/Bmp6/Prkce/Fgfr3/Adgrf5/Ptk2b/Fdps/Mlycd/Mup1	24
BP	GO:1901617	organic hydroxy compound biosynthetic process	26/1014	159/20432	7.84995e-08	3.17485e-06	Cyp51/Ddt/Por/Mvd/Srebf1/Fdft1/Hmgcr/Hsd17b7/Nr4a2/Bmp2/Pmvk/Acer3/Nsdhl/Msmo1/Sc5d/Apoa5/Lss/Fgf1/Bmp6/Mvk/Insig1/Dhcr7/Ptk2b/Fdps/Cyp2d22/Hmgcs1	26
BP	GO:0042180	cellular ketone metabolic process	26/1014	161/20432	1.01654e-07	4.29258e-06	Cyp17a1/Cav1/Mid1ip1/Kdsr/Plin5/Pdk4/Avpr1a/Srebf1/Nr1d1/Stat5b/Hmgcr/Ppara/Stard4/Acadl/Slc45a3/Kynu/Bmp2/Cyp2b10/Apoa5/Bmp6/Kyat1/Kyat3/Acacb/Prkce/Insig1/Mlycd	26
CC	GO:0015935	small ribosomal subunit	16/1029	66/20678	1.02799e-07	0.0245831	Rps11/Rps9/Rps18/Rps5/Rps14/Rps24/Rps20/Rps29/Rps16/Rps8/Rps23/Npm1/Rps7/Rps12/Rps28/Rps27	16
BP	GO:0044262	cellular carbohydrate metabolic process	33/1014	240/20432	1.13038e-07	7.45924e-06	Kat2b/Hsd11b1/Pdk4/Igfbp3/Galk1/Nr1d1/Gpld1/Ppara/Synj2/Tff3/Pcdh12/Impa2/Igfbp5/Slc45a3/Sord/Itpka/Rorc/Sesn2/Pgd/Abcg2/Idh2/Lcmt1/Treh/Serpina12/Gck/Acacb/Prkce/Lepr/Ptk2b/Trp53/Mlycd/G6pc/Mup1	33
MF	GO:0042623	ATPase activity, coupled	39/1012	313/20358	1.26507e-07	0.0363564	Psmc3/Myo9b/Atp4a/Abca1/Clpx/Lonrf3/Atp5g3/Atp6v0a1/Psmc5/Myh9/Eif4a2/Atp5c1/Xrcc5/Abca2/Abcb11/Atp9a/Atp6v0d2/Psmc2/Abcb1b/Abcb8/Abcg2/Psmc4/Myh14/Atp11a/Nudt7/Smarca4/Ddx19b/Recql4/Tap1/Atp11b/Atp5l/Atp8b1/Abcb1a/Ddx24/Abca8a/Abcb4/Nudt6/Atp8b4/Hspa1a	39
BP	GO:0046889	positive regulation of lipid biosynthetic process	17/1014	77/20432	1.72303e-07	9.17731e-06	Cyp17a1/Por/Mid1ip1/Plin5/Avpr1a/Srebf1/Nr1d1/Gpld1/Stard4/Abhd6/Slc45a3/Apoa5/Ldlr/Fgf1/Bmp6/Adgrf5/Fdps	17
BP	GO:0009991	response to extracellular stimulus	35/1014	269/20432	1.8687e-07	1.065e-05	Angptl4/Pdk4/Lrp11/Srebf1/Ncoa1/Fos/Ppara/Srebf2/Plec/Arsa/Pim1/Cbs/Eif2ak2/Rptor/Atf3/Nr4a2/Kynu/Gatm/Ahcy/Ntrk1/Alb/Asns/Atg7/Serpina7/Bbs2/Map1lc3b/Kank2/Bmp6/Gck/Acacb/Zc3h12a/Pcsk9/Trp53/Mup1/Fcor	35
BP	GO:0055088	lipid homeostasis	22/1014	125/20432	2.0731e-07	1.23659e-05	Angptl4/Cav1/Abca1/Nr1d1/Acox2/Srebf2/Gpihbp1/Acadl/Sesn2/Atg7/Apoa5/Ldlr/Etfa/Cebpa/Mylip/Asgr2/Pnpla3/Gck/Abcb4/Pcsk9/Angptl8/G6pc	22
CC	GO:0005743	mitochondrial inner membrane	45/1029	397/20678	2.36673e-07	0.0245831	Slc25a1/Phb2/Letm1/Gcat/Slc25a13/Clpx/Atp5g3/Slc25a22/Pdk4/Micu1/Slc25a29/Slc25a48/Ndufb9/Cyc1/Slc25a45/Ndufb8/Sirt3/Atp5c1/Mpc2/Gatm/Crls1/Abcb8/Slc25a33/Mthfd2l/Idh2/Slc25a15/Cyb5b/Slc25a20/Cox18/Uqcrfs1/Atp5l/Timm8b/Ndufb10/Abca8a/Slc25a47/2410015M20Rik/Slc25a44/Atp5k/Immp2l/Nat8f1/Uqcrh/Ndufb6/Usmg5/Mpst/Cox7a1	45
BP	GO:0031667	response to nutrient levels	32/1014	243/20432	4.72776e-07	1.26168e-05	Angptl4/Pdk4/Lrp11/Srebf1/Ncoa1/Ppara/Srebf2/Plec/Arsa/Pim1/Cbs/Eif2ak2/Rptor/Atf3/Kynu/Gatm/Ahcy/Ntrk1/Alb/Asns/Atg7/Serpina7/Bbs2/Map1lc3b/Kank2/Gck/Acacb/Zc3h12a/Pcsk9/Trp53/Mup1/Fcor	32
MF	GO:0048037	cofactor binding	34/1012	268/20358	5.26384e-07	0.0364441	Srr/Por/Hsd11b1/Sgk1/Acly/Eci2/Hmgcr/Dhfr/Acox2/Hacl1/Sqle/Cbs/Fasn/Sirt3/Acadl/Agxt/Kynu/Sord/Ahcy/Cth/Pgd/Mthfr/Ugdh/Alb/Asns/Idh2/Oat/Dus2/Etfa/Kyat1/Fmo2/Fmo1/Kyat3/Aox3	34
CC	GO:0005840	ribosome	29/1029	210/20678	6.33235e-07	0.0263616	Rps11/Rps9/Rps18/Rps5/Rps14/Rps24/Rps20/Rpl22/Prmt3/Rbm3/Rps29/Rps16/Rpl10a/Rpl12/Rpl22l1/Mrps27/Rpl9/Rps8/Rps23/Npm1/Rpl32/Rpl32l/Rps7/Rps12/Rpl35/Rps28/Rpl13a/Rpl39/Rps27	29
CC	GO:0019866	organelle inner membrane	47/1029	438/20678	6.3744e-07	0.0270023	Slc25a1/Phb2/Letm1/Gcat/Slc25a13/Clpx/Atp5g3/Slc25a22/Pdk4/Micu1/Slc25a29/Slc25a48/Ndufb9/Cyc1/Slc25a45/Ndufb8/Sirt3/Atp5c1/Mpc2/Gatm/Crls1/Abcb8/Slc25a33/Mthfd2l/Idh2/Slc25a15/Cyb5b/Slc25a20/Cox18/Uqcrfs1/Atp5l/Timm8b/Ndufb10/Abca8a/Dpy19l3/Slc25a47/2410015M20Rik/Slc25a44/Atp5k/Immp2l/Nat8f1/Uqcrh/Ifi27/Ndufb6/Usmg5/Mpst/Cox7a1	47
BP	GO:0044723	single-organism carbohydrate metabolic process	45/1014	414/20432	7.14011e-07	1.57937e-05	Kat2b/St3gal1/Pdk4/Cry1/Igfbp3/Galk1/Nr1d1/Gpld1/Ppara/Pmm2/St3gal6/Synj2/Tff3/Pcdh12/Impa2/Rbp4/Igfbp5/Slc45a3/Atf3/Sord/Itpka/Rorc/St3gal3/Gale/Sesn2/Pgd/Abcg2/Idh2/Pgm2l1/Lcmt1/St3gal4/Treh/Galt/Pik3r1/Serpina12/Gck/Acacb/Mgat2/Angptl8/Lepr/Ptk2b/Trp53/Mlycd/G6pc/Mup1	45
MF	GO:0043492	ATPase activity, coupled to movement of substances	21/1012	124/20358	7.76328e-07	0.0364441	Atp4a/Abca1/Atp5g3/Atp6v0a1/Atp5c1/Abca2/Abcb11/Atp9a/Atp6v0d2/Abcb1b/Abcb8/Abcg2/Atp11a/Tap1/Atp11b/Atp5l/Atp8b1/Abcb1a/Abca8a/Abcb4/Atp8b4	21
BP	GO:0006639	acylglycerol metabolic process	19/1014	105/20432	8.9048e-07	1.69957e-05	Lipe/Cav1/Plin5/Srebf1/Gpld1/Plpp1/Abhd6/Lpin3/Slc27a5/Apoa5/Ldlr/Serpina12/Pnpla3/Pcsk9/Insig1/Apof/Ces1d/Ces1g/G6pc	19
BP	GO:0010675	regulation of cellular carbohydrate metabolic process	22/1014	136/20432	9.32939e-07	2.04327e-05	Kat2b/Hsd11b1/Pdk4/Igfbp3/Nr1d1/Gpld1/Ppara/Tff3/Igfbp5/Slc45a3/Rorc/Sesn2/Lcmt1/Serpina12/Gck/Acacb/Prkce/Lepr/Ptk2b/Trp53/Mlycd/Mup1	22
BP	GO:0072329	monocarboxylic acid catabolic process	18/1014	96/20432	1.00005e-06	2.50971e-05	Lipe/Plin5/Eci2/Acox2/Hacl1/Ehhadh/Acat2/Cyp39a1/Acadl/Agxt/Slc27a2/Lpin3/Sesn2/Etfa/Akr1d1/Acacb/Ces1d/Mlycd	18
BP	GO:0032870	cellular response to hormone stimulus	47/1014	447/20432	1.04931e-06	2.57794e-05	Kat2b/Sp1/Daxx/Calr/Phb2/Aqp1/Prkaca/Nr1i3/Cav1/Bmp7/Rarres2/Pdk4/Sgk1/Cry1/Avpr1a/Srebf1/Ncoa1/Nr1d1/Stat5b/Gpld1/Ppara/Rangap1/Nr1i2/Rela/Baiap2/Cpeb1/Nr4a2/Rorc/Casp9/Slc25a33/Clock/Bbs2/Smarca4/Kank2/Ube2l3/Pik3r1/Serpina12/Gck/Shc1/Pcsk9/Prkce/Prkca/Junb/Arntl/Ntrk2/Lepr/Jund	47
BP	GO:0006006	glucose metabolic process	26/1014	181/20432	1.05898e-06	2.6394e-05	Kat2b/Pdk4/Cry1/Igfbp3/Nr1d1/Gpld1/Ppara/Tff3/Rbp4/Igfbp5/Slc45a3/Atf3/Rorc/Sesn2/Pgm2l1/Lcmt1/Pik3r1/Serpina12/Gck/Acacb/Angptl8/Lepr/Trp53/Mlycd/G6pc/Mup1	26
CC	GO:0005777	peroxisome	22/1029	137/20678	1.11047e-06	0.0273703	Mvd/Cav1/Eci2/Hmgcr/Acox2/Hacl1/Ehhadh/Paox/Mff/Agxt/Pex16/Slc27a2/Pmvk/Idh2/Nudt7/Decr2/Mvk/Acot4/Ide/Fdps/Acnat1/Mlycd	22
CC	GO:0042579	microbody	22/1029	137/20678	1.11047e-06	0.0273703	Mvd/Cav1/Eci2/Hmgcr/Acox2/Hacl1/Ehhadh/Paox/Mff/Agxt/Pex16/Slc27a2/Pmvk/Idh2/Nudt7/Decr2/Mvk/Acot4/Ide/Fdps/Acnat1/Mlycd	22
BP	GO:0006638	neutral lipid metabolic process	19/1014	107/20432	1.20089e-06	2.83191e-05	Lipe/Cav1/Plin5/Srebf1/Gpld1/Plpp1/Abhd6/Lpin3/Slc27a5/Apoa5/Ldlr/Serpina12/Pnpla3/Pcsk9/Insig1/Apof/Ces1d/Ces1g/G6pc	19
BP	GO:0010906	regulation of glucose metabolic process	19/1014	108/20432	1.39039e-06	2.84198e-05	Kat2b/Pdk4/Igfbp3/Nr1d1/Gpld1/Ppara/Tff3/Igfbp5/Slc45a3/Rorc/Sesn2/Lcmt1/Serpina12/Gck/Acacb/Lepr/Trp53/Mlycd/Mup1	19
BP	GO:0044272	sulfur compound biosynthetic process	16/1014	80/20432	1.62187e-06	3.81734e-05	Sp1/Pdk4/Acly/Cbs/Mpc2/Ahcy/Gclm/Cth/Extl1/Ggt6/Acacb/Pxylp1/Hs6st1/Mat2a/Mpst/Mlycd	16
BP	GO:0071407	cellular response to organic cyclic compound	44/1014	414/20432	1.73462e-06	4.12742e-05	Smo/Daxx/Calr/Phb2/Aqp1/Nr1i3/Cav1/Bmp7/Sgk1/Cry1/Nr1d1/Gpld1/Tert/Ppara/Nr1i2/App/Pim1/Rela/Igfbp5/Nr4a2/Bmp2/Adar/Ntrk1/Rorc/Pde4b/Casp9/Clock/Zc3hav1/Rbm3/Smarca4/Kank2/Dnm2/Ifit1/Cebpa/Ube2l3/Abcb4/Zc3h12a/Arntl/Ntrk2/Npm1/Gnai1/Rap1a/Mup11/Mup1	44
BP	GO:0044282	small molecule catabolic process	31/1014	246/20432	1.84553e-06	4.12742e-05	Lipe/Plin5/Arg1/Galk1/Eci2/Acox2/Hacl1/Ehhadh/Synj2/Acat2/Cyp39a1/Impa2/Acadl/Agxt/Kynu/Sord/Slc27a2/Lpin3/Ahcy/Gale/Sesn2/Qprt/Oat/Etfa/Galt/Akr1d1/Acacb/Acot4/Ces1d/Trp53/Mlycd	31
CC	GO:0005811	lipid particle	14/1029	63/20678	1.98945e-06	0.0278333	Lipe/Cav1/Plin5/Hspa4/Atg2a/Vcp/Hsd17b11/Cidec/Nsdhl/Lss/Sigmar1/Abhd4/Pnpla3/Ces1d	14
BP	GO:0010565	regulation of cellular ketone metabolic process	18/1014	101/20432	2.15825e-06	5.75225e-05	Cav1/Mid1ip1/Plin5/Pdk4/Avpr1a/Srebf1/Nr1d1/Ppara/Stard4/Acadl/Slc45a3/Bmp2/Apoa5/Bmp6/Acacb/Prkce/Insig1/Mlycd	18
CC	GO:0005925	focal adhesion	39/1029	350/20678	2.27328e-06	0.0278333	Rps11/Calr/Fblim1/Rps9/Cav1/Rps18/Rps5/Plau/Myh9/Plec/Rps14/Capn1/Nfasc/Mpzl1/Dcaf6/Rpl22/Actb/Tspan9/Nox4/Parva/Rexo2/Dnm2/Rps29/Tns2/Rps16/Rpl10a/Tgm2/Rpl12/Pi4ka/Rpl9/Rps8/Cfl1/Npm1/Palld/Ptk2b/Rps7/Fat1/Rpl13a/Hspa1a	39
CC	GO:0005924	cell-substrate adherens junction	39/1029	355/20678	3.21309e-06	0.0278333	Rps11/Calr/Fblim1/Rps9/Cav1/Rps18/Rps5/Plau/Myh9/Plec/Rps14/Capn1/Nfasc/Mpzl1/Dcaf6/Rpl22/Actb/Tspan9/Nox4/Parva/Rexo2/Dnm2/Rps29/Tns2/Rps16/Rpl10a/Tgm2/Rpl12/Pi4ka/Rpl9/Rps8/Cfl1/Npm1/Palld/Ptk2b/Rps7/Fat1/Rpl13a/Hspa1a	39
BP	GO:0006730	one-carbon metabolic process	10/1014	34/20432	3.82001e-06	5.75225e-05	Dhfr/Car1/Car3/Mthfr/Mthfd2l/Ahcyl2/Car5b/Car8/Mat2a/Mthfs	10
BP	GO:0031668	cellular response to extracellular stimulus	23/1014	160/20432	4.31107e-06	6.29602e-05	Angptl4/Pdk4/Srebf1/Ncoa1/Fos/Srebf2/Pim1/Eif2ak2/Rptor/Atf3/Nr4a2/Alb/Asns/Atg7/Map1lc3b/Kank2/Bmp6/Gck/Zc3h12a/Pcsk9/Trp53/Mup1/Fcor	23
MF	GO:0016829	lyase activity	25/1012	183/20358	4.39995e-06	0.0364843	Srr/Ddt/Cyp17a1/Mvd/Hacl1/Tgds/Ehhadh/Cbs/Fasn/Sirt3/Xrcc5/Scly/Car1/Car3/Cth/Acer3/Car5b/Naxd/Car14/Kyat1/Kyat3/Car8/Mocs1/Macrod2/Mlycd	25
CC	GO:0045177	apical part of cell	40/1029	374/20678	4.66571e-06	0.0278333	Srr/Aqp1/Atp4a/Hsd11b1/Slc22a5/Ocln/Cldn1/Plec/Gpihbp1/App/Slc10a2/Slc23a1/Acy3/Pard3/Cd55/Abcb11/Lrp2/Atp6v0d2/Mpdz/Cyp4a31/Abcb1b/Abcg2/Nox4/Aqp8/Stx4a/Ldlr/Acpp/P2ry2/Gnat1/Reep6/Clic4/Igfbp2/Atp8b1/Abcb1a/Abcb4/Prkca/Adgrf5/Cyp4a32/Afdn/Hspa1a	40
BP	GO:0071496	cellular response to external stimulus	25/1014	184/20432	4.72033e-06	9.24446e-05	Angptl4/Aqp1/Cav1/Pdk4/Srebf1/Ncoa1/Fos/Srebf2/Pim1/Eif2ak2/Rptor/Atf3/Nr4a2/Alb/Asns/Atg7/Map1lc3b/Kank2/Bmp6/Gck/Zc3h12a/Pcsk9/Trp53/Mup1/Fcor	25
CC	GO:0030055	cell-substrate junction	39/1029	361/20678	4.81179e-06	0.0278333	Rps11/Calr/Fblim1/Rps9/Cav1/Rps18/Rps5/Plau/Myh9/Plec/Rps14/Capn1/Nfasc/Mpzl1/Dcaf6/Rpl22/Actb/Tspan9/Nox4/Parva/Rexo2/Dnm2/Rps29/Tns2/Rps16/Rpl10a/Tgm2/Rpl12/Pi4ka/Rpl9/Rps8/Cfl1/Npm1/Palld/Ptk2b/Rps7/Fat1/Rpl13a/Hspa1a	39
MF	GO:0016705	oxidoreductase activity, acting on paired donors, with incorporation or reduction of molecular oxygen	27/1012	209/20358	5.41233e-06	0.0364843	Cyp51/Cyp17a1/Por/Cmah/Sqle/Cyp39a1/Fads3/Cyp2u1/Cyp4a31/Cyp4b1/Cyp2b10/Msmo1/Sc5d/Fmo2/Fmo1/Cyp2c37/Fads6/Agmo/Cyp2c50/Cyp3a11/Cyp2d22/Cyp4a32/Cyp4a12a/Cyp2c54/Cyp2d40/Cyp2c68/Cyp2d10	27
BP	GO:0016054	organic acid catabolic process	24/1014	177/20432	7.52991e-06	9.36852e-05	Lipe/Plin5/Arg1/Eci2/Acox2/Hacl1/Ehhadh/Acat2/Cyp39a1/Acadl/Agxt/Kynu/Slc27a2/Lpin3/Ahcy/Sesn2/Qprt/Oat/Etfa/Akr1d1/Acacb/Acot4/Ces1d/Mlycd	24
BP	GO:0006633	fatty acid biosynthetic process	20/1014	132/20432	8.03197e-06	9.81301e-05	Elovl1/Mid1ip1/Pdk4/Avpr1a/Srebf1/Acly/Fads3/Fasn/Acadl/Slc45a3/Prkab1/Msmo1/Sc5d/Apoa5/Decr2/Acacb/Fads6/Insig1/Agmo/Mlycd	20
BP	GO:0009108	coenzyme biosynthetic process	16/1014	90/20432	8.10493e-06	0.000112176	Pdk4/Nampt/Acly/Dhfr/Nadk2/Mpc2/Kynu/Mthfd2l/Idh2/Qprt/Nmnat3/Acacb/Mat2a/Mocs1/Mthfs/Mlycd	16
BP	GO:0010876	lipid localization	35/1014	317/20432	8.54241e-06	0.000114432	Cav1/Plin5/Abca1/Cry1/Stat5b/Ppara/Srebf2/Gpihbp1/Slc10a2/Acat2/Stard4/Rbp4/Abca2/Abcb11/Slc27a2/Atp9a/Slc27a5/Aqp8/Atp11a/Apoa5/Ldlr/Slco2a1/P2ry2/Sigmar1/Bmp6/Atp8b1/Thbs1/Abhd4/Abca8a/Acacb/Abcb4/Zc3h12a/Apof/Pla2r1/Mup1	35
BP	GO:0046364	monosaccharide biosynthetic process	14/1014	71/20432	8.5622e-06	0.000119518	Kat2b/Cry1/Nr1d1/Ppara/Rbp4/Atf3/Sord/Sesn2/Pgd/Serpina12/Gck/Lepr/G6pc/Mup1	14
BP	GO:0006641	triglyceride metabolic process	16/1014	91/20432	9.38681e-06	0.000120388	Lipe/Cav1/Plin5/Srebf1/Gpld1/Lpin3/Slc27a5/Apoa5/Ldlr/Serpina12/Pnpla3/Pcsk9/Insig1/Apof/Ces1g/G6pc	16
BP	GO:0019218	regulation of steroid metabolic process	16/1014	91/20432	9.38681e-06	0.000120388	Cyp17a1/Por/Srebf1/Nr1d1/Stat5b/Stard4/Acadl/Bmp2/Rorc/Apoa5/Fgf1/Bmp6/Serpina12/Insig1/Dhcr7/Fdps	16
BP	GO:0046486	glycerolipid metabolic process	30/1014	254/20432	9.996e-06	0.000127069	Lipe/Cav1/Plin5/Srebf1/Gpld1/Plpp1/Serinc2/Pigx/Synj2/Impa2/Pi4k2a/Abhd6/Pdgfa/Crls1/Lpin3/Fam126a/Slc27a5/Cdipt/Apoa5/Ldlr/Serpina12/Pnpla3/Pi4ka/Pcsk9/Insig1/Apof/Ces1d/Ces1g/Etnk2/G6pc	30
CC	GO:0031597	cytosolic proteasome complex	6/1029	12/20678	1.06758e-05	0.0278333	Psmc3/Psmc5/Psmd14/Psmc2/Psmc4/Ide	6
BP	GO:1901605	alpha-amino acid metabolic process	23/1014	170/20432	1.20149e-05	0.000128029	Srr/Arg1/Stat5b/Dhfr/Cbs/Agxt/Kynu/Ahcy/Gclm/Cth/Mthfr/Mthfd2l/Asns/Ahcyl2/Nox4/Oat/Nmnat3/Kyat1/Kyat3/Cyp2d22/Mpst/Ggh/Bhmt	23
BP	GO:0031669	cellular response to nutrient levels	20/1014	136/20432	1.2675e-05	0.00013327	Angptl4/Pdk4/Srebf1/Ncoa1/Srebf2/Pim1/Eif2ak2/Rptor/Atf3/Alb/Asns/Atg7/Map1lc3b/Kank2/Gck/Zc3h12a/Pcsk9/Trp53/Mup1/Fcor	20
MF	GO:0022804	active transmembrane transporter activity	38/1012	363/20358	1.27561e-05	0.0374714	Atp4a/Slc5a6/Slc41a1/Abca1/Atp5g3/Slc22a5/Slc25a22/Atp6v0a1/Slc16a7/Slc1a4/Slc36a1/Slc17a1/Slc10a2/Slc23a1/Atp5c1/Slc45a3/Abca2/Abcb11/Slc20a1/Atp6v0d2/Abcb1b/Abcb8/Abcg2/Slc13a4/Slco1a4/Slc7a2/Slco2a1/Slc17a2/Tap1/Mfsd4b1/Atp5l/Slc7a5/Abcb1a/Abca8a/Abcb4/Slc15a5/Slc22a26/Gm6614	38
BP	GO:0017144	drug metabolic process	8/1014	24/20432	1.29172e-05	0.000150712	Nr1i2/Cyp4b1/Dck/Cyp2b10/Sult1a1/Fmo2/Fmo1/Cyp2d22	8
BP	GO:0006109	regulation of carbohydrate metabolic process	22/1014	160/20432	1.42548e-05	0.000156171	Kat2b/Hsd11b1/Pdk4/Igfbp3/Nr1d1/Gpld1/Ppara/Tff3/Igfbp5/Slc45a3/Rorc/Sesn2/Lcmt1/Serpina12/Gck/Acacb/Prkce/Lepr/Ptk2b/Trp53/Mlycd/Mup1	22
BP	GO:0000096	sulfur amino acid metabolic process	7/1014	18/20432	1.42677e-05	0.000166167	Cbs/Ahcy/Cth/Mthfr/Ahcyl2/Nox4/Mpst	7
BP	GO:0071396	cellular response to lipid	41/1014	408/20432	1.51379e-05	0.000166167	Smo/Daxx/Calr/Phb2/Aqp1/Nr1i3/Bmp7/Abca1/Pdk4/Sgk1/Cry1/Nr1d1/Gpld1/Ppara/Nr1i2/Pim1/Rela/Mrc1/Nr4a2/Rorc/Pde4b/Casp9/Clock/Nfkbib/Smarca4/Ldlr/Kank2/Trib1/Serpine1/Ube2l3/Bmp6/Abcb4/Zc3h12a/Prkce/Prkca/Arntl/Ntrk2/Gnai1/Ptk2b/Mup11/Mup1	41
MF	GO:0016836	hydro-lyase activity	13/1012	65/20358	1.5471e-05	0.0379264	Tgds/Ehhadh/Cbs/Fasn/Sirt3/Car1/Car3/Acer3/Car5b/Naxd/Car14/Car8/Macrod2	13
BP	GO:0046395	carboxylic acid catabolic process	22/1014	161/20432	1.57516e-05	0.000171807	Lipe/Plin5/Arg1/Eci2/Acox2/Hacl1/Ehhadh/Acat2/Cyp39a1/Acadl/Agxt/Slc27a2/Lpin3/Sesn2/Qprt/Oat/Etfa/Akr1d1/Acacb/Acot4/Ces1d/Mlycd	22
BP	GO:0009062	fatty acid catabolic process	15/1014	85/20432	1.69346e-05	0.000179668	Lipe/Plin5/Eci2/Acox2/Hacl1/Ehhadh/Acat2/Acadl/Slc27a2/Lpin3/Sesn2/Etfa/Acacb/Ces1d/Mlycd	15
MF	GO:0070330	aromatase activity	9/1012	32/20358	1.77929e-05	0.0379264	Cyp2u1/Cyp4b1/Cyp2b10/Cyp2c37/Cyp2c50/Cyp3a11/Cyp4a12a/Cyp2c54/Cyp2d10	9
BP	GO:0010893	positive regulation of steroid biosynthetic process	8/1014	25/20432	1.81717e-05	0.000187	Cyp17a1/Por/Srebf1/Nr1d1/Stard4/Fgf1/Bmp6/Fdps	8
BP	GO:0032868	response to insulin	24/1014	187/20432	1.92415e-05	0.000214034	Kat2b/Sp1/Rarres2/Pdk4/Sgk1/Cry1/Srebf1/Gpld1/Ppara/Rela/Rbp4/Baiap2/Cpeb1/Scly/Sesn2/Slc25a33/Pik3r1/Serpina12/Gck/Shc1/Pcsk9/Prkca/Sort1/Ggh	24
BP	GO:0016042	lipid catabolic process	30/1014	263/20432	1.97472e-05	0.000345629	Lipe/Rarres2/Plin5/Hsd11b1/Fmc1/Gpld1/Eci2/Acox2/Hacl1/Ehhadh/Acat2/Cyp39a1/Lipa/Abhd6/Acadl/Slc27a2/Lpin3/Sesn2/Plbd2/Apoa5/Etfa/Akr1d1/Abhd4/Pnpla3/Acacb/Adora1/Prkce/Hcar2/Ces1d/Mlycd	30
BP	GO:0043434	response to peptide hormone	30/1014	263/20432	1.97472e-05	0.000370939	Kat2b/Sp1/Cav1/Rarres2/Pdk4/Sgk1/Cry1/Srebf1/Stat5b/Gpld1/Ppara/Rangap1/Cyc1/Rela/Rbp4/Baiap2/Cpeb1/Scly/Nr4a2/Gatm/Sesn2/Slc25a33/Pik3r1/Serpina12/Gck/Shc1/Pcsk9/Prkca/Sort1/Ggh	30
BP	GO:0046496	nicotinamide nucleotide metabolic process	19/1014	129/20432	2.02704e-05	0.000410079	Hsd11b1/Nampt/Galk1/Nadk2/Ppara/Taldo1/Mpc2/Kynu/Vcp/Gale/Pgd/Idh2/Qprt/Nmnat3/Galt/Fmo2/Fmo1/Gck/Trp53	19
BP	GO:0051188	cofactor biosynthetic process	19/1014	129/20432	2.02704e-05	0.000440029	Pdk4/Nampt/Acly/Dhfr/Nadk2/Mpc2/Kynu/Mthfd2l/Idh2/Qprt/Ireb2/Fam96a/Nmnat3/Rsad1/Acacb/Mat2a/Mocs1/Mthfs/Mlycd	19
MF	GO:0020037	heme binding	18/1012	118/20358	2.09192e-05	0.0379264	Cyp51/Cyp17a1/Pxdn/Nr1d1/Cyc1/Cyp39a1/Cbs/Cyp2u1/Cyp4b1/Cyp2b10/Cyb5b/Cyp2c37/Hebp1/Cyp2c50/Cyp3a11/Cyp4a12a/Cyp2c54/Cyp2d10	18
BP	GO:0045940	positive regulation of steroid metabolic process	9/1014	33/20432	2.30889e-05	0.000688174	Cyp17a1/Por/Srebf1/Nr1d1/Stard4/Apoa5/Fgf1/Bmp6/Fdps	9
BP	GO:0030258	lipid modification	23/1014	177/20432	2.33069e-05	0.000712775	Por/Plin5/Pdk4/Eci2/Acox2/Plpp1/Hacl1/Ppara/Ehhadh/Synj2/Acat2/Stard4/Impa2/Pi4k2a/Acadl/Slc27a2/Sesn2/Fam126a/Apoa5/Etfa/Pi4ka/Acacb/Mlycd	23
BP	GO:0019362	pyridine nucleotide metabolic process	19/1014	131/20432	2.52857e-05	0.000712775	Hsd11b1/Nampt/Galk1/Nadk2/Ppara/Taldo1/Mpc2/Kynu/Vcp/Gale/Pgd/Idh2/Qprt/Nmnat3/Galt/Fmo2/Fmo1/Gck/Trp53	19
BP	GO:0006733	oxidoreduction coenzyme metabolic process	20/1014	144/20432	2.97605e-05	0.000725607	Hsd11b1/Nampt/Galk1/Hmgcr/Nadk2/Ppara/Taldo1/Mpc2/Kynu/Vcp/Gale/Pgd/Idh2/Qprt/Nmnat3/Galt/Fmo2/Fmo1/Gck/Trp53	20
BP	GO:0019319	hexose biosynthetic process	13/1014	69/20432	2.97759e-05	0.000725607	Kat2b/Cry1/Nr1d1/Ppara/Rbp4/Atf3/Sord/Sesn2/Serpina12/Gck/Lepr/G6pc/Mup1	13
BP	GO:0019359	nicotinamide nucleotide biosynthetic process	6/1014	14/20432	3.13415e-05	0.000758677	Nampt/Nadk2/Kynu/Idh2/Qprt/Nmnat3	6
BP	GO:0050667	homocysteine metabolic process	6/1014	14/20432	3.13415e-05	0.000767577	Cbs/Ahcy/Cth/Mthfr/Nox4/Mpst	6
BP	GO:0072524	pyridine-containing compound metabolic process	19/1014	133/20432	3.13813e-05	0.000767577	Hsd11b1/Nampt/Galk1/Nadk2/Ppara/Taldo1/Mpc2/Kynu/Vcp/Gale/Pgd/Idh2/Qprt/Nmnat3/Galt/Fmo2/Fmo1/Gck/Trp53	19
BP	GO:0001101	response to acid chemical	24/1014	193/20432	3.25254e-05	0.0008033	Aqp1/Abca1/Pdk4/Lrp11/Ncoa1/Dhfr/Cbs/Rbp4/Rptor/Cpeb1/Pdgfc/Sesn2/Hsd17b2/Aars/Ldlr/Ctsh/Lefty1/S100a10/Abcb4/Zc3h12a/Krt8/Ntrk2/Cfl1/Ptk2b	24
BP	GO:0042493	response to drug	26/1014	219/20432	3.49639e-05	0.000816585	Aqp1/Atp4a/Slc22a5/Ncoa1/Fos/Gpld1/Cldn1/Nr1i2/Abcb11/Ntrk1/Gclm/Pde4b/Cyp4b1/Abcb1b/Abcg2/Cyp2b10/Serpina7/Serpine1/Atp8b1/Abcb1a/Junb/Mat2a/Trp53/Rap1a/Jund/Ggh	26
BP	GO:0008206	bile acid metabolic process	9/1014	35/20432	3.865e-05	0.00094918	Nr1d1/Cyp39a1/Stard4/Slc27a2/Slco1a4/Slc27a5/Akr1d1/Atp8b1/Gm6614	9
BP	GO:0009069	serine family amino acid metabolic process	9/1014	35/20432	3.865e-05	0.000984633	Srr/Dhfr/Cbs/Agxt/Ahcy/Gclm/Cth/Ahcyl2/Mpst	9
MF	GO:0016712	oxidoreductase activity, acting on paired donors, with incorporation or reduction of molecular oxygen, reduced flavin or flavoprotein as one donor, and incorporation of one atom of oxygen	9/1012	35/20358	3.91507e-05	0.0380731	Cyp2u1/Cyp4b1/Cyp2b10/Cyp2c37/Cyp2c50/Cyp3a11/Cyp4a12a/Cyp2c54/Cyp2d10	9
BP	GO:0007623	circadian rhythm	23/1014	183/20432	3.9807e-05	0.000987003	Cry1/Srebf1/Nampt/Nr1d1/Id4/Ppara/Ahcy/Ntrk1/Rorc/Clock/Alb/Bhlhe41/Ciart/Arntl2/Adora1/Mat2a/Arntl/Ntrk2/Nfil3/Lepr/Trp53/Dbp/Mup1	23
MF	GO:0005319	lipid transporter activity	16/1012	102/20358	4.1806e-05	0.0381057	Abca1/Slc10a2/Rbp4/Abcb11/Slc27a2/Atp9a/Slco1a4/Slc27a5/Atp11a/Apoa5/Slco2a1/Atp11b/Atp8b1/Abcb4/Atp8b4/Gm6614	16
BP	GO:0033500	carbohydrate homeostasis	25/1014	210/20432	4.68955e-05	0.00105558	Prkaca/Gprc5b/Pdk4/Cry1/Nr1d1/Gpld1/Hmgcr/Rbp4/Map4k4/Igfbp5/Mpc2/Sesn2/Atg7/Nox4/Stx4a/Smarca4/Cebpa/Pik3r1/Gck/Prkce/Adgrf5/Lepr/G6pc/Mup1/Fcor	25
BP	GO:0042593	glucose homeostasis	25/1014	210/20432	4.68955e-05	0.00105558	Prkaca/Gprc5b/Pdk4/Cry1/Nr1d1/Gpld1/Hmgcr/Rbp4/Map4k4/Igfbp5/Mpc2/Sesn2/Atg7/Nox4/Stx4a/Smarca4/Cebpa/Pik3r1/Gck/Prkce/Adgrf5/Lepr/G6pc/Mup1/Fcor	25
BP	GO:0007584	response to nutrient	11/1014	53/20432	4.76285e-05	0.00110247	Ncoa1/Plec/Arsa/Pim1/Cbs/Eif2ak2/Kynu/Gatm/Ahcy/Serpina7/Kank2	11
BP	GO:1901652	response to peptide	31/1014	289/20432	4.7865e-05	0.00112951	Kat2b/Sp1/Cav1/Rarres2/Pdk4/Sgk1/Cry1/Avpr1a/Srebf1/Stat5b/Gpld1/Ppara/Rangap1/Cyc1/Rela/Rbp4/Baiap2/Cpeb1/Scly/Nr4a2/Gatm/Sesn2/Slc25a33/Pik3r1/Serpina12/Gck/Shc1/Pcsk9/Prkca/Sort1/Ggh	31
BP	GO:0070254	mucus secretion	6/1014	15/20432	5.00423e-05	0.00119594	Atg7/Map1lc3b/P2ry2/Adora1/Prkce/Vamp8	6
MF	GO:0046906	tetrapyrrole binding	18/1012	126/20358	5.13413e-05	0.0383724	Cyp51/Cyp17a1/Pxdn/Nr1d1/Cyc1/Cyp39a1/Cbs/Cyp2u1/Cyp4b1/Cyp2b10/Cyb5b/Cyp2c37/Hebp1/Cyp2c50/Cyp3a11/Cyp4a12a/Cyp2c54/Cyp2d10	18
BP	GO:0001678	cellular glucose homeostasis	17/1014	115/20432	5.19531e-05	0.00126415	Prkaca/Nr1d1/Gpld1/Hmgcr/Map4k4/Mpc2/Sesn2/Atg7/Nox4/Stx4a/Smarca4/Pik3r1/Gck/Prkce/Lepr/Mup1/Fcor	17
BP	GO:0015711	organic anion transport	29/1014	265/20432	5.78802e-05	0.00131223	Slc5a6/Slc25a13/Slc25a22/Slc16a7/Avpr1a/Slc1a4/Slc36a1/Slc10a2/Serinc2/Slc23a1/Agxt/Mpc2/Abcb11/Slc27a2/Abcg2/Slco1a4/Slc27a5/Aqp8/Slc7a2/Slco2a1/P2ry2/Slc7a5/Thbs1/Adora1/Abcb4/Slc22a26/Pla2r1/Ntrk2/Gm6614	29
BP	GO:0015893	drug transport	8/1014	29/20432	6.04053e-05	0.00131223	Slc22a5/Cldn1/Nr1i2/Abcb11/Abcb1b/Abcg2/Atp8b1/Abcb1a	8
MF	GO:0016835	carbon-oxygen lyase activity	14/1012	84/20358	6.3053e-05	0.0394866	Tgds/Ehhadh/Cbs/Fasn/Sirt3/Xrcc5/Car1/Car3/Acer3/Car5b/Naxd/Car14/Car8/Macrod2	14
BP	GO:1901699	cellular response to nitrogen compound	40/1014	422/20432	7.13299e-05	0.00131223	Kat2b/Sp1/Aqp1/Cav1/Rarres2/Pdk4/Sgk1/Srebf1/Stat5b/Gpld1/Tert/Rangap1/App/Rela/Baiap2/Rptor/Cpeb1/Igfbp5/Nr4a2/Adar/Pdgfc/Ntrk1/Pde4b/Sesn2/Slc25a33/Zc3hav1/Rbm3/Dnm2/Ifit1/Thbs1/Pik3r1/Serpina12/Gck/Shc1/Zc3h12a/Pcsk9/Prkca/Ntrk2/Npm1/Rap1a	40
BP	GO:0019395	fatty acid oxidation	15/1014	96/20432	7.40301e-05	0.00131223	Por/Plin5/Pdk4/Eci2/Acox2/Hacl1/Ppara/Ehhadh/Acat2/Acadl/Slc27a2/Sesn2/Etfa/Acacb/Mlycd	15
BP	GO:0019217	regulation of fatty acid metabolic process	13/1014	75/20432	7.40497e-05	0.00131223	Cav1/Mid1ip1/Plin5/Pdk4/Avpr1a/Srebf1/Ppara/Acadl/Slc45a3/Apoa5/Acacb/Insig1/Mlycd	13
MF	GO:0046943	carboxylic acid transmembrane transporter activity	16/1012	107/20358	7.57523e-05	0.0397739	Slc3a2/Slc25a13/Slc25a22/Slc16a7/Slc1a4/Slc36a1/Slc10a2/Serinc2/Abcb11/Slco1a4/Slc25a15/Slc7a2/Slco2a1/Slc38a7/Slc7a5/Gm6614	16
MF	GO:0004012	phospholipid-translocating ATPase activity	6/1012	16/20358	7.74158e-05	0.040119	Atp9a/Atp11a/Atp11b/Atp8b1/Abcb4/Atp8b4	6
BP	GO:0009743	response to carbohydrate	20/1014	154/20432	7.83735e-05	0.00146802	Prkaca/Srebf1/Nr1d1/Gpld1/Hmgcr/Map4k4/Mpc2/Sesn2/Atg7/Nox4/Stx4a/Smarca4/Thbs1/Gck/Prkce/Prkca/Lepr/Calcrl/Acvr2b/Mup1	20
MF	GO:0008392	arachidonic acid epoxygenase activity	10/1012	47/20358	8.49944e-05	0.0405476	Cyp4a31/Cyp2b10/Cyp2c37/Cyp2c50/Cyp2d22/Cyp4a32/Cyp2c54/Cyp2d40/Cyp2c68/Cyp2d10	10
BP	GO:0006094	gluconeogenesis	12/1014	66/20432	8.60709e-05	0.00146802	Kat2b/Cry1/Nr1d1/Ppara/Rbp4/Atf3/Sesn2/Serpina12/Gck/Lepr/G6pc/Mup1	12
BP	GO:0009267	cellular response to starvation	16/1014	109/20432	9.31894e-05	0.00157142	Angptl4/Pdk4/Srebf1/Srebf2/Eif2ak2/Atf3/Alb/Asns/Atg7/Map1lc3b/Gck/Zc3h12a/Pcsk9/Trp53/Mup1/Fcor	16
BP	GO:0046942	carboxylic acid transport	25/1014	219/20432	9.33254e-05	0.00171074	Slc5a6/Slc25a13/Slc25a22/Slc16a7/Avpr1a/Slc1a4/Slc36a1/Slc10a2/Serinc2/Slc23a1/Agxt/Mpc2/Abcb11/Slc27a2/Slc27a5/Aqp8/Slc7a2/Slco2a1/P2ry2/Slc7a5/Thbs1/Adora1/Abcb4/Pla2r1/Ntrk2	25
MF	GO:0052689	carboxylic ester hydrolase activity	21/1012	168/20358	9.39683e-05	0.0405476	Lipe/Acot12/Lipa/Abhd6/Sirt3/Car1/Plbd2/Acer3/Aars/Acot11/Pnpla7/Abhd4/Pnpla3/Acot4/Ces2a/Ces1d/Ces1g/Ces1c/Macrod2/Acot1/Ces1b	21
BP	GO:0034440	lipid oxidation	15/1014	98/20432	9.42703e-05	0.00180241	Por/Plin5/Pdk4/Eci2/Acox2/Hacl1/Ppara/Ehhadh/Acat2/Acadl/Slc27a2/Sesn2/Etfa/Acacb/Mlycd	15
MF	GO:0050661	NADP binding	9/1012	39/20358	9.82362e-05	0.0416856	Por/Hsd11b1/Hmgcr/Dhfr/Fasn/Pgd/Mthfr/Fmo2/Fmo1	9
MF	GO:0005342	organic acid transmembrane transporter activity	16/1012	110/20358	0.000106108	0.0419492	Slc3a2/Slc25a13/Slc25a22/Slc16a7/Slc1a4/Slc36a1/Slc10a2/Serinc2/Abcb11/Slco1a4/Slc25a15/Slc7a2/Slco2a1/Slc38a7/Slc7a5/Gm6614	16
MF	GO:0042626	ATPase activity, coupled to transmembrane movement of substances	16/1012	110/20358	0.000106108	0.0422102	Atp4a/Abca1/Atp5g3/Atp6v0a1/Atp5c1/Abca2/Abcb11/Atp6v0d2/Abcb1b/Abcb8/Abcg2/Tap1/Atp5l/Abcb1a/Abca8a/Abcb4	16
BP	GO:0032103	positive regulation of response to external stimulus	27/1014	248/20432	0.000112116	0.00180241	Lgals9/Il16/Calr/Gprc5b/Rarres2/Dhx58/Tnip1/Stat5b/Hrg/Ptprj/Clock/Tnfrsf1a/Stx4a/Fgfr1/Ets1/Ldlr/Serpine1/Tgm2/Bmp6/Camk1d/Thbs1/Vamp8/Prkca/S100a8/Ptk2b/Cxcl12/Tmem102	27
BP	GO:0019363	pyridine nucleotide biosynthetic process	6/1014	17/20432	0.000113581	0.00182835	Nampt/Nadk2/Kynu/Idh2/Qprt/Nmnat3	6
MF	GO:0016820	hydrolase activity, acting on acid anhydrides, catalyzing transmembrane movement of substances	16/1012	111/20358	0.000118356	0.0429374	Atp4a/Abca1/Atp5g3/Atp6v0a1/Atp5c1/Abca2/Abcb11/Atp6v0d2/Abcb1b/Abcb8/Abcg2/Tap1/Atp5l/Abcb1a/Abca8a/Abcb4	16
BP	GO:0090181	regulation of cholesterol metabolic process	7/1014	24/20432	0.000119405	0.00182835	Por/Srebf1/Acadl/Fgf1/Serpina12/Dhcr7/Fdps	7
MF	GO:0008391	arachidonic acid monooxygenase activity	10/1012	49/20358	0.000123255	0.0429374	Cyp4a31/Cyp2b10/Cyp2c37/Cyp2c50/Cyp2d22/Cyp4a32/Cyp2c54/Cyp2d40/Cyp2c68/Cyp2d10	10
BP	GO:0045833	negative regulation of lipid metabolic process	13/1014	79/20432	0.000128514	0.00182835	Plin5/Fmc1/Gpld1/Pdgfa/Acadl/Bmp2/Atg7/Serpina12/Acacb/Adora1/Insig1/Hcar2/Mup1	13
BP	GO:0042304	regulation of fatty acid biosynthetic process	8/1014	32/20432	0.00012965	0.00186734	Mid1ip1/Pdk4/Avpr1a/Srebf1/Acadl/Slc45a3/Apoa5/Insig1	8
CC	GO:0022625	cytosolic large ribosomal subunit	11/1029	59/20678	0.000136481	0.0278333	Rpl22/Rpl10a/Rpl12/Rpl22l1/Rpl9/Rpl32/Rpl32l/Rps12/Rpl35/Rpl13a/Rpl39	11
MF	GO:0008395	steroid hydroxylase activity	12/1012	69/20358	0.000136501	0.0429374	Cyp17a1/Cyp39a1/Cyp2u1/Cyp2b10/Cyp2c37/Cyp2c50/Cyp3a11/Cyp2d22/Cyp2c54/Cyp2d40/Cyp2c68/Cyp2d10	12
BP	GO:0006869	lipid transport	29/1014	280/20432	0.00015345	0.00187162	Cav1/Abca1/Cry1/Ppara/Srebf2/Gpihbp1/Slc10a2/Acat2/Stard4/Rbp4/Abca2/Abcb11/Slc27a2/Atp9a/Slc27a5/Aqp8/Atp11a/Apoa5/Ldlr/Slco2a1/P2ry2/Sigmar1/Bmp6/Atp8b1/Thbs1/Abca8a/Abcb4/Apof/Pla2r1	29
BP	GO:0048545	response to steroid hormone	26/1014	240/20432	0.000161413	0.00195236	Daxx/Calr/Phb2/Aqp1/Nr1i3/Cav1/Bmp7/Sgk1/Cry1/Ncoa1/Nr1d1/Ppara/Nr1i2/Cpn1/Agxt/Nr4a2/Rorc/Casp9/Clock/Sult1a1/Smarca4/Kank2/Ube2l3/Pik3r1/Arntl/Ntrk2	26
BP	GO:0072525	pyridine-containing compound biosynthetic process	6/1014	18/20432	0.000163237	0.0019874	Nampt/Nadk2/Kynu/Idh2/Qprt/Nmnat3	6
BP	GO:0042594	response to starvation	17/1014	126/20432	0.000164977	0.00210412	Angptl4/Pdk4/Lrp11/Srebf1/Srebf2/Eif2ak2/Atf3/Alb/Asns/Atg7/Map1lc3b/Gck/Zc3h12a/Pcsk9/Trp53/Mup1/Fcor	17
MF	GO:0050662	coenzyme binding	22/1012	188/20358	0.000171882	0.0430254	Por/Hsd11b1/Eci2/Hmgcr/Dhfr/Acox2/Hacl1/Sqle/Fasn/Sirt3/Acadl/Sord/Ahcy/Pgd/Mthfr/Ugdh/Idh2/Dus2/Etfa/Fmo2/Fmo1/Aox3	22
MF	GO:0015399	primary active transmembrane transporter activity	16/1012	115/20358	0.000180557	0.0440982	Atp4a/Abca1/Atp5g3/Atp6v0a1/Atp5c1/Abca2/Abcb11/Atp6v0d2/Abcb1b/Abcb8/Abcg2/Tap1/Atp5l/Abcb1a/Abca8a/Abcb4	16
MF	GO:0015405	P-P-bond-hydrolysis-driven transmembrane transporter activity	16/1012	115/20358	0.000180557	0.0441628	Atp4a/Abca1/Atp5g3/Atp6v0a1/Atp5c1/Abca2/Abcb11/Atp6v0d2/Abcb1b/Abcb8/Abcg2/Tap1/Atp5l/Abcb1a/Abca8a/Abcb4	16
MF	GO:0016614	oxidoreductase activity, acting on CH-OH group of donors	19/1012	151/20358	0.00018236	0.0447535	Kdsr/Hsd11b1/Dhrs13/Dhrs7/Hmgcr/Ehhadh/Fasn/Hsd17b7/Hsd17b12/Sord/Bmp2/Pgd/Ugdh/Hsd17b11/Idh2/Nsdhl/Hsd17b2/Aox3/Rdh11	19
BP	GO:0001676	long-chain fatty acid metabolic process	14/1014	93/20432	0.000191356	0.00214462	Lipe/Acadl/Slc27a2/Slc27a5/Cyp2b10/Cyp2c37/Acot4/Cyp2c50/Cyp2d22/Cyp2c54/Cyp2d40/Acot1/Cyp2c68/Cyp2d10	14
BP	GO:0071248	cellular response to metal ion	14/1014	93/20432	0.000191356	0.00214462	Aqp1/Slc41a1/Fos/Gpld1/Hrg/Slc40a1/Cebpa/Clic4/Bmp6/Junb/Adgrv1/Ank3/Jund/Bnip3	14
BP	GO:0009749	response to glucose	18/1014	140/20432	0.00019933	0.00218283	Prkaca/Srebf1/Nr1d1/Gpld1/Hmgcr/Map4k4/Mpc2/Sesn2/Atg7/Nox4/Stx4a/Smarca4/Thbs1/Gck/Prkce/Lepr/Acvr2b/Mup1	18
BP	GO:0006739	NADP metabolic process	8/1014	34/20432	0.000204895	0.00250673	Hsd11b1/Nadk2/Taldo1/Pgd/Idh2/Fmo2/Fmo1/Gck	8
BP	GO:0006699	bile acid biosynthetic process	6/1014	19/20432	0.000228598	0.00250673	Nr1d1/Cyp39a1/Stard4/Slc27a2/Slc27a5/Akr1d1	6
BP	GO:0010817	regulation of hormone levels	41/1014	461/20432	0.000231506	0.00250673	Cyp17a1/Aqp1/Por/Cry1/Srebf1/Nr1d1/Stat5b/Gpld1/Hmgcr/Rbp4/Sirt3/Rptor/Map4k4/Mpc2/Lrp2/Bmp2/Schip1/Clock/Sult1b1/Hsd17b11/Atg7/Sult1a1/Stx4a/Serpina7/Fgfr1/Hsd17b2/Dio1/Akr1d1/Bmp6/Abcb1a/Gck/Adora1/Prkce/Hcar2/Vamp8/Arntl/Retsat/Ide/Lepr/Acvr2b/Mup1	41
BP	GO:0051701	interaction with host	13/1014	84/20432	0.000242398	0.00250673	Cav1/Slc22a5/Tnip1/Trim8/Apcs/Alb/Zc3hav1/Atg7/Vps18/Tap1/Zc3h12a/Vamp8/Lgals1	13
BP	GO:0009746	response to hexose	18/1014	143/20432	0.000260367	0.00259163	Prkaca/Srebf1/Nr1d1/Gpld1/Hmgcr/Map4k4/Mpc2/Sesn2/Atg7/Nox4/Stx4a/Smarca4/Thbs1/Gck/Prkce/Lepr/Acvr2b/Mup1	18
BP	GO:0008299	isoprenoid biosynthetic process	7/1014	27/20432	0.000268877	0.00266103	Mvd/Fdft1/Hmgcr/Pmvk/Mvk/Fdps/Hmgcs1	7
MF	GO:0090484	drug transporter activity	7/1012	27/20358	0.000271601	0.0447535	Slc22a5/Abcb11/Abcb1b/Abcg2/Slc38a7/Abcb1a/Abcb4	7
BP	GO:0002583	regulation of antigen processing and presentation of peptide antigen	5/1014	13/20432	0.000274616	0.00293238	Abcb1b/Tap1/Tapbpl/Abcb1a/Abcb4	5
BP	GO:0060192	negative regulation of lipase activity	5/1014	13/20432	0.000274616	0.00302741	Angptl4/Por/Plin5/Angptl8/Sort1	5
BP	GO:0070255	regulation of mucus secretion	5/1014	13/20432	0.000274616	0.0035369	Atg7/Map1lc3b/P2ry2/Adora1/Prkce	5
BP	GO:0050994	regulation of lipid catabolic process	10/1014	54/20432	0.000282831	0.00359527	Rarres2/Plin5/Fmc1/Gpld1/Apoa5/Acacb/Adora1/Prkce/Hcar2/Mlycd	10
BP	GO:0034284	response to monosaccharide	18/1014	144/20432	0.000284046	0.00359527	Prkaca/Srebf1/Nr1d1/Gpld1/Hmgcr/Map4k4/Mpc2/Sesn2/Atg7/Nox4/Stx4a/Smarca4/Thbs1/Gck/Prkce/Lepr/Acvr2b/Mup1	18
BP	GO:0001892	embryonic placenta development	15/1014	108/20432	0.000284829	0.00360427	Sp1/Wnt2/Rspo3/Ncoa1/Pcdh12/Sp3/Nsdhl/Cebpa/Hectd1/Cdkn1c/Cited2/Erf/Hs6st1/Krt8/Junb	15
BP	GO:0003158	endothelium development	15/1014	108/20432	0.000284829	0.00360427	Pecam1/Lect1/Cldn1/Slc40a1/Abcb1b/Tnfrsf1a/Cdh5/Btg1/Fgf1/Clic4/Bmp6/Cldn5/Acvr2b/Afdn/Rap1a	15
BP	GO:0071322	cellular response to carbohydrate stimulus	15/1014	108/20432	0.000284829	0.00376597	Prkaca/Nr1d1/Gpld1/Hmgcr/Map4k4/Mpc2/Atg7/Nox4/Stx4a/Smarca4/Prkce/Prkca/Lepr/Calcrl/Mup1	15
CC	GO:0098798	mitochondrial protein complex	18/1029	144/20678	0.000293711	0.0280037	Tomm40l/Clpx/Atp5g3/Micu1/Ndufb9/Ndufb8/Atp5c1/Etfa/Uqcrfs1/Atp5l/Ndufb10/2410015M20Rik/Atp5k/Immp2l/Uqcrh/Ndufb6/Usmg5/Tomm5	18
CC	GO:0044455	mitochondrial membrane part	20/1029	170/20678	0.000315041	0.0287988	Tomm40l/Atp5g3/Micu1/Ndufb9/Synj2/Ndufb8/Atp5c1/Cox18/Uqcrfs1/Atp5l/Ndufb10/2410015M20Rik/Atp5k/Immp2l/Uqcrh/Ndufb6/Usmg5/Cox7a1/Bnip3/Tomm5	20
MF	GO:0009931	calcium-dependent protein serine/threonine kinase activity	6/1012	20/20358	0.000315716	0.0467448	Mapkapk2/Mknk2/Camk4/Grk3/Adck2/Prkca	6
CC	GO:0016324	apical plasma membrane	28/1029	279/20678	0.000348046	0.031366	Aqp1/Atp4a/Slc22a5/Ocln/Cldn1/Plec/Gpihbp1/Slc10a2/Slc23a1/Acy3/Cd55/Abcb11/Lrp2/Atp6v0d2/Mpdz/Cyp4a31/Abcb1b/Abcg2/Nox4/Aqp8/Stx4a/P2ry2/Gnat1/Igfbp2/Atp8b1/Abcb4/Cyp4a32/Hspa1a	28
BP	GO:0071241	cellular response to inorganic substance	15/1014	110/20432	0.000348772	0.00409364	Aqp1/Slc41a1/Fos/Gpld1/Hrg/Slc40a1/Cebpa/Clic4/Bmp6/Thbs1/Junb/Adgrv1/Ank3/Jund/Bnip3	15
CC	GO:0000323	lytic vacuole	39/1029	439/20678	0.000351752	0.0315022	Mmd/Atraid/Slc36a1/Arsg/Gpld1/Ap3m1/Arsa/Hrg/Lipa/Capn1/Pi4k2a/Rptor/Tmem9/Abca2/Lrp2/Atp6v0d2/Slc35f6/Plbd2/Zc3hav1/Atp11a/Map1lc3b/Ldlr/Ctsh/Acpp/P2ry2/Vps18/Pnpla7/Pcsk9/Irgm1/Vamp8/Fgfr3/Gnai1/Calcrl/Zfyve26/Sort1/Ank3/Ggh/Ctsf/Rnaset2a	39
CC	GO:0005764	lysosome	39/1029	439/20678	0.000351752	0.0317997	Mmd/Atraid/Slc36a1/Arsg/Gpld1/Ap3m1/Arsa/Hrg/Lipa/Capn1/Pi4k2a/Rptor/Tmem9/Abca2/Lrp2/Atp6v0d2/Slc35f6/Plbd2/Zc3hav1/Atp11a/Map1lc3b/Ldlr/Ctsh/Acpp/P2ry2/Vps18/Pnpla7/Pcsk9/Irgm1/Vamp8/Fgfr3/Gnai1/Calcrl/Zfyve26/Sort1/Ank3/Ggh/Ctsf/Rnaset2a	39
BP	GO:0006520	cellular amino acid metabolic process	21/1014	185/20432	0.000355329	0.00413126	Srr/Arg1/Stat5b/Dhfr/Cbs/Farsb/Agxt/Eprs/Cth/Mthfr/Mthfd2l/Asns/Atg7/Oat/Aars/Nmnat3/Kyat3/Sars2/Mpst/Ggh/Bhmt	21
BP	GO:0042274	ribosomal small subunit biogenesis	11/1014	66/20432	0.000372452	0.00415867	Rps5/Rps14/Rps24/Pwp2/Utp6/Rps16/Rps8/Npm1/Rps7/Rps28/Rps27	11
BP	GO:0050810	regulation of steroid biosynthetic process	11/1014	66/20432	0.000372452	0.0043499	Cyp17a1/Por/Srebf1/Nr1d1/Stard4/Bmp2/Fgf1/Bmp6/Insig1/Dhcr7/Fdps	11
CC	GO:0000502	proteasome complex	11/1029	66/20678	0.000381264	0.0317997	Psmc3/Psmc5/Slc10a2/Psmd14/Rad23b/Vcp/Psmc2/Psmc4/Usp14/Ide/Psmb9	11
CC	GO:1905369	endopeptidase complex	11/1029	66/20678	0.000381264	0.0320322	Psmc3/Psmc5/Slc10a2/Psmd14/Rad23b/Vcp/Psmc2/Psmc4/Usp14/Ide/Psmb9	11
BP	GO:0045923	positive regulation of fatty acid metabolic process	8/1014	37/20432	0.000381768	0.0043499	Mid1ip1/Plin5/Avpr1a/Srebf1/Ppara/Slc45a3/Apoa5/Mlycd	8
BP	GO:0010984	regulation of lipoprotein particle clearance	5/1014	14/20432	0.000409768	0.00435043	Gpld1/Gpihbp1/Mylip/Pcsk9/Ces1g	5
MF	GO:0004089	carbonate dehydratase activity	5/1012	14/20358	0.000412904	0.0467448	Car1/Car3/Car5b/Car14/Car8	5
MF	GO:0010857	calcium-dependent protein kinase activity	6/1012	21/20358	0.000423519	0.046855	Mapkapk2/Mknk2/Camk4/Grk3/Adck2/Prkca	6
BP	GO:0002064	epithelial cell development	23/1014	215/20432	0.000450248	0.00475656	Smo/Pecam1/Lect1/Cldn1/Pard3/Ntrk1/Abcb1b/Clock/Rilpl1/Tnfrsf1a/Fgfr1/Cdh5/Smarca4/Fndc3a/Clic4/Bmp6/Cldn5/Arid4a/Fgfr3/Arntl/Palld/Afdn/Rap1a	23
BP	GO:0010608	posttranscriptional regulation of gene expression	32/1014	342/20432	0.000456061	0.00512327	Calr/Rps9/Cav1/Carhsp1/Rps5/Mapkapk2/Mknk2/Btg2/Mif4gd/Tert/Eif4a2/App/Eif2ak2/Paip1/Cpeb1/Igfbp5/Eprs/Adar/Sesn2/Rbm3/Ireb2/Eefsec/Zc3h12d/Thbs1/Mvk/Zc3h12a/Prkca/Bcl3/Npm1/Ptk2b/Nck2/Rpl13a	32
BP	GO:0030324	lung development	22/1014	202/20432	0.00046404	0.00513981	Sp1/Wnt2/Hsd11b1/Tab1/Foxp4/Slc23a1/Lipa/Rbp4/Pdgfa/Igfbp5/Sp3/Cux1/Fgfr1/Ctsh/Cebpa/Fgf1/Hs6st1/Fgfr3/Dhcr7/Acvr2b/Rpl13a/Esrp2	22
BP	GO:0006417	regulation of translation	28/1014	285/20432	0.000469146	0.00519116	Calr/Rps9/Rps5/Mknk2/Btg2/Mif4gd/Eif4a2/App/Eif2ak2/Paip1/Cpeb1/Igfbp5/Eprs/Adar/Sesn2/Rbm3/Ireb2/Eefsec/Zc3h12d/Thbs1/Mvk/Zc3h12a/Prkca/Bcl3/Npm1/Ptk2b/Nck2/Rpl13a	28
MF	GO:0001046	core promoter sequence-specific DNA binding	15/1012	113/20358	0.000475709	0.0475139	Sp1/Cry1/Nr1d1/Stat5b/Fos/Nsd1/Rela/Nr4a2/Sp3/Clock/Smarca4/Ciart/Arntl/Nfil3/Trp53	15
BP	GO:0001885	endothelial cell development	10/1014	58/20432	0.000515418	0.00519116	Pecam1/Lect1/Cldn1/Abcb1b/Tnfrsf1a/Cdh5/Clic4/Cldn5/Afdn/Rap1a	10
MF	GO:0016616	oxidoreductase activity, acting on the CH-OH group of donors, NAD or NADP as acceptor	16/1012	126/20358	0.000517072	0.0482756	Kdsr/Hsd11b1/Hmgcr/Ehhadh/Fasn/Hsd17b7/Hsd17b12/Sord/Bmp2/Pgd/Ugdh/Hsd17b11/Idh2/Nsdhl/Hsd17b2/Rdh11	16
BP	GO:0046461	neutral lipid catabolic process	7/1014	30/20432	0.00054114	0.00535142	Lipe/Plin5/Gpld1/Abhd6/Apoa5/Pnpla3/Ces1d	7
BP	GO:0046464	acylglycerol catabolic process	7/1014	30/20432	0.00054114	0.00539938	Lipe/Plin5/Gpld1/Abhd6/Apoa5/Pnpla3/Ces1d	7
BP	GO:0050995	negative regulation of lipid catabolic process	6/1014	22/20432	0.00055315	0.00556835	Plin5/Fmc1/Gpld1/Acacb/Adora1/Hcar2	6
BP	GO:0007586	digestion	16/1014	127/20432	0.000554974	0.00556835	Aqp1/Slc22a5/Pbld1/Acat2/Cyp39a1/Tff3/Rbp4/Copa/Abcg2/Apoa5/Ldlr/Ireb2/Capn8/Akr1d1/Abcb1a/Vamp8	16
BP	GO:0009066	aspartate family amino acid metabolic process	8/1014	39/20432	0.000557153	0.00556835	Ahcy/Cth/Mthfr/Mthfd2l/Asns/Ahcyl2/Nmnat3/Bhmt	8
MF	GO:0015238	drug transmembrane transporter activity	6/1012	22/20358	0.000558012	0.0492482	Abcb11/Abcb1b/Abcg2/Slc38a7/Abcb1a/Abcb4	6
BP	GO:0030323	respiratory tube development	22/1014	205/20432	0.000567899	0.00556835	Sp1/Wnt2/Hsd11b1/Tab1/Foxp4/Slc23a1/Lipa/Rbp4/Pdgfa/Igfbp5/Sp3/Cux1/Fgfr1/Ctsh/Cebpa/Fgf1/Hs6st1/Fgfr3/Dhcr7/Acvr2b/Rpl13a/Esrp2	22
BP	GO:0009070	serine family amino acid biosynthetic process	5/1014	15/20432	0.000589632	0.00570091	Srr/Dhfr/Cbs/Agxt/Cth	5
BP	GO:0051004	regulation of lipoprotein lipase activity	5/1014	15/20432	0.000589632	0.00570091	Angptl4/Gpihbp1/Apoa5/Angptl8/Sort1	5
BP	GO:0006820	anion transport	35/1014	392/20432	0.000600363	0.00595077	Slc5a6/Clic3/Slc25a13/Slc25a22/Slc16a7/Avpr1a/Slc1a4/Slc36a1/Slc17a1/Slc10a2/Serinc2/Slc23a1/Agxt/Mpc2/Abcb11/Slc27a2/Slc20a1/Abcg2/Slco1a4/Slc27a5/Aqp8/Fgfr1/Slc7a2/Slco2a1/P2ry2/Ttyh2/Clic4/Slc7a5/Thbs1/Adora1/Abcb4/Slc22a26/Pla2r1/Ntrk2/Gm6614	35
BP	GO:0071417	cellular response to organonitrogen compound	32/1014	348/20432	0.000615145	0.00595077	Kat2b/Sp1/Aqp1/Cav1/Rarres2/Pdk4/Sgk1/Srebf1/Stat5b/Gpld1/Rangap1/App/Rela/Baiap2/Rptor/Cpeb1/Igfbp5/Nr4a2/Pdgfc/Ntrk1/Pde4b/Sesn2/Slc25a33/Dnm2/Pik3r1/Serpina12/Gck/Shc1/Pcsk9/Prkca/Ntrk2/Rap1a	32
BP	GO:0006635	fatty acid beta-oxidation	11/1014	70/20432	0.000626406	0.00633679	Plin5/Eci2/Acox2/Ehhadh/Acat2/Acadl/Slc27a2/Sesn2/Etfa/Acacb/Mlycd	11
BP	GO:0045446	endothelial cell differentiation	13/1014	93/20432	0.000666618	0.00668438	Pecam1/Lect1/Cldn1/Abcb1b/Tnfrsf1a/Cdh5/Btg1/Clic4/Bmp6/Cldn5/Acvr2b/Afdn/Rap1a	13
MF	GO:0016765	transferase activity, transferring alkyl or aryl (other than methyl) groups	10/1012	60/20358	0.000689634	0.0492625	Fdft1/Gsto1/Gstm4/Cth/Nans/Mmab/Gsta4/Gstt2/Mat2a/Fdps	10
BP	GO:0031348	negative regulation of defense response	18/1014	155/20432	0.000695982	0.00696617	Lgals9/Dhx58/Ppara/Fcgr2b/Nmi/Adar/Clec2d/Tnfrsf1a/Ets1/Tap1/Metrnl/Mvk/Adora1/Zc3h12a/Ctla2a/Cx3cr1/Calcrl/Cnr2	18
BP	GO:0006720	isoprenoid metabolic process	11/1014	71/20432	0.000708573	0.00698027	Mvd/Rarres2/Fdft1/Hmgcr/Rbp4/Pmvk/Mvk/Retsat/Fdps/Rdh11/Hmgcs1	11
BP	GO:0002577	regulation of antigen processing and presentation	6/1014	23/20432	0.000717198	0.00699052	Abcb1b/Tap1/Tapbpl/Thbs1/Abcb1a/Abcb4	6
CC	GO:0015934	large ribosomal subunit	13/1029	94/20678	0.00075826	0.0320322	Rpl22/Rbm3/Rpl10a/Rpl12/Rpl22l1/Rpl9/Npm1/Rpl32/Rpl32l/Rps12/Rpl35/Rpl13a/Rpl39	13
BP	GO:1901607	alpha-amino acid biosynthetic process	10/1014	61/20432	0.000778802	0.00733695	Srr/Dhfr/Cbs/Agxt/Ahcy/Cth/Mthfr/Mthfd2l/Asns/Bhmt	10
CC	GO:0044438	microbody part	10/1029	61/20678	0.000795452	0.0323842	Mvd/Cav1/Hmgcr/Paox/Agxt/Pex16/Slc27a2/Decr2/Ide/Mlycd	10
CC	GO:0044439	peroxisomal part	10/1029	61/20678	0.000795452	0.0334807	Mvd/Cav1/Hmgcr/Paox/Agxt/Pex16/Slc27a2/Decr2/Ide/Mlycd	10
CC	GO:1905368	peptidase complex	12/1029	83/20678	0.000800657	0.0334807	Psmc3/Psmc5/Slc10a2/Psmd14/Rad23b/Vcp/Psmc2/Psmc4/Supt3/Usp14/Ide/Psmb9	12
BP	GO:0033144	negative regulation of intracellular steroid hormone receptor signaling pathway	7/1014	32/20432	0.000820442	0.00733695	Calr/Phb2/Cry1/Clock/Smarca4/Kank2/Arntl	7
BP	GO:0045540	regulation of cholesterol biosynthetic process	5/1014	16/20432	0.000822778	0.00733695	Por/Srebf1/Fgf1/Dhcr7/Fdps	5
CC	GO:0005782	peroxisomal matrix	5/1029	16/20678	0.000833063	0.0334807	Mvd/Paox/Agxt/Ide/Mlycd	5
CC	GO:0031907	microbody lumen	5/1029	16/20678	0.000833063	0.0334807	Mvd/Paox/Agxt/Ide/Mlycd	5
BP	GO:0061178	regulation of insulin secretion involved in cellular response to glucose stimulus	10/1014	62/20432	0.000887959	0.00733695	Nr1d1/Gpld1/Hmgcr/Map4k4/Mpc2/Atg7/Stx4a/Prkce/Lepr/Mup1	10
CC	GO:0031012	extracellular matrix	41/1029	492/20678	0.000907486	0.0334807	Angptl4/Rps11/Calr/Rps18/Bmp7/Rarres2/Wnt2/Rps5/Gfod2/Pxdn/Gpld1/Lect1/Myh9/Plec/Tff3/Rps14/Gsto1/Apcs/Hsd17b12/Lmna/Rps20/Col15a1/Rpl22/Alb/Tfpi2/Adamts7/Fras1/Fgf1/Tubb4b/Serpine1/Rps16/Tgm2/Rpl12/Thbs1/Lad1/Rpl9/Nav2/Cfl1/Rps7/Actg1/Lgals1	41
BP	GO:0034248	regulation of cellular amide metabolic process	29/1014	312/20432	0.000915333	0.00796347	Calr/Rps9/Rps5/Hsd11b1/Mknk2/Btg2/Mif4gd/Eif4a2/App/Eif2ak2/Paip1/Cpeb1/Igfbp5/Eprs/Adar/Sesn2/Rbm3/Ireb2/Eefsec/Zc3h12d/Thbs1/Mvk/Zc3h12a/Prkca/Bcl3/Npm1/Ptk2b/Nck2/Rpl13a	29
BP	GO:0006111	regulation of gluconeogenesis	8/1014	42/20432	0.000937002	0.00796347	Kat2b/Nr1d1/Ppara/Sesn2/Serpina12/Gck/Lepr/Mup1	8
BP	GO:0001890	placenta development	18/1014	159/20432	0.000939552	0.00822191	Sp1/Wnt2/Rspo3/Ncoa1/Pcdh12/Sp3/Nsdhl/Hsd17b2/Cebpa/Hectd1/Serpine1/Cdkn1c/Cited2/Erf/Hs6st1/Krt8/Junb/Etnk2	18
BP	GO:0050727	regulation of inflammatory response	26/1014	270/20432	0.000987756	0.00822896	Lgals9/Gprc5b/Tnip1/Stat5b/Ppara/Rela/Cd55/Fcgr2b/Clock/Tnfrsf1a/Slc7a2/Ets1/Ldlr/Serpine1/Tgm2/Metrnl/Mvk/Adora1/Zc3h12a/Ctla2a/Vamp8/Prkca/Cx3cr1/S100a8/Calcrl/Cnr2	26
BP	GO:0044242	cellular lipid catabolic process	19/1014	173/20432	0.000993856	0.00822896	Lipe/Plin5/Gpld1/Eci2/Acox2/Hacl1/Ehhadh/Acat2/Abhd6/Acadl/Slc27a2/Lpin3/Sesn2/Apoa5/Etfa/Pnpla3/Acacb/Ces1d/Mlycd	19
BP	GO:0071375	cellular response to peptide hormone stimulus	21/1014	200/20432	0.000993883	0.00822896	Kat2b/Sp1/Cav1/Rarres2/Pdk4/Sgk1/Srebf1/Stat5b/Gpld1/Rangap1/Rela/Baiap2/Cpeb1/Nr4a2/Slc25a33/Pik3r1/Serpina12/Gck/Shc1/Pcsk9/Prkca	21
BP	GO:0002428	antigen processing and presentation of peptide antigen via MHC class Ib	4/1014	10/20432	0.000995351	0.00822896	Abcb1b/Tap1/Abcb1a/Abcb4	4
BP	GO:0009435	NAD biosynthetic process	4/1014	10/20432	0.000995351	0.00822896	Nampt/Kynu/Qprt/Nmnat3	4
BP	GO:0070257	positive regulation of mucus secretion	4/1014	10/20432	0.000995351	0.00822896	Atg7/Map1lc3b/P2ry2/Prkce	4
BP	GO:0048246	macrophage chemotaxis	7/1014	33/20432	0.000997244	0.00822896	Myo9b/Rarres2/Ptprj/Thbs1/Cx3cr1/Ptk2b/Rpl13a	7
CC	GO:0046581	intercellular canaliculus	4/1029	10/20678	0.00100563	0.0340782	Abcb11/Abcb1b/Abcb1a/Abcb4	4
BP	GO:0019915	lipid storage	10/1014	63/20432	0.00100936	0.00837732	Cav1/Plin5/Cry1/Stat5b/Ppara/Srebf2/Abhd4/Acacb/Zc3h12a/Mup1	10
BP	GO:0048511	rhythmic process	28/1014	300/20432	0.0010442	0.00926516	Kat2b/Sp1/Cry1/Srebf1/Nampt/Nr1d1/Stat5b/Id4/Ppara/Ahcy/Schip1/Ntrk1/Rorc/Clock/Alb/Bhlhe41/Ciart/Arntl2/Adora1/Mat2a/Arntl/Ntrk2/Nfil3/Immp2l/Lepr/Trp53/Dbp/Mup1	28
MF	GO:0030170	pyridoxal phosphate binding	9/1012	53/20358	0.00110112	0.0498506	Srr/Cbs/Agxt/Kynu/Cth/Alb/Oat/Kyat1/Kyat3	9
CC	GO:0098800	inner mitochondrial membrane protein complex	14/1029	110/20678	0.00111648	0.0341936	Atp5g3/Micu1/Ndufb9/Ndufb8/Atp5c1/Uqcrfs1/Atp5l/Ndufb10/2410015M20Rik/Atp5k/Immp2l/Uqcrh/Ndufb6/Usmg5	14
BP	GO:0070613	regulation of protein processing	10/1014	64/20432	0.00114401	0.00930215	Prkaca/Fuz/Myh9/Rhbdd1/Cd55/Birc3/Serpine1/Thbs1/Ctla2a/Angptl8	10
BP	GO:0033273	response to vitamin	6/1014	25/20432	0.00115573	0.00965657	Pim1/Cbs/Eif2ak2/Kynu/Serpina7/Kank2	6
MF	GO:0016769	transferase activity, transferring nitrogenous groups	6/1012	25/20358	0.00116565	0.0498506	Agxt/Gatm/Oat/Tgm2/Kyat1/Kyat3	6
BP	GO:0071383	cellular response to steroid hormone stimulus	20/1014	189/20432	0.00117824	0.0102845	Daxx/Calr/Phb2/Aqp1/Nr1i3/Bmp7/Sgk1/Cry1/Nr1d1/Ppara/Nr1i2/Nr4a2/Rorc/Casp9/Clock/Smarca4/Kank2/Ube2l3/Arntl/Ntrk2	20
BP	GO:0009894	regulation of catabolic process	37/1014	438/20432	0.00118029	0.0104534	Prkaca/Rarres2/Plin5/Atraid/Hsd11b1/Fmc1/Btg2/Igfbp3/Nbas/Rnf144a/Gpld1/Ppara/Rela/Rhbdd1/Psmd14/Rad23b/Vcp/Nub1/Zc3hav1/Atg7/Apoa5/Ldlr/Trib1/Mylip/Ptpn3/Gck/Acacb/Adora1/Zc3h12a/Pcsk9/Prkce/Hcar2/Usp14/Arntl/Ptk2b/Trp53/Mlycd	37
BP	GO:0046460	neutral lipid biosynthetic process	7/1014	34/20432	0.00120267	0.0104534	Plin5/Srebf1/Gpld1/Plpp1/Lpin3/Ldlr/Pnpla3	7
BP	GO:0046463	acylglycerol biosynthetic process	7/1014	34/20432	0.00120267	0.0104534	Plin5/Srebf1/Gpld1/Plpp1/Lpin3/Ldlr/Pnpla3	7
BP	GO:0043401	steroid hormone mediated signaling pathway	17/1014	150/20432	0.00126999	0.0104534	Daxx/Calr/Phb2/Nr1i3/Bmp7/Sgk1/Cry1/Nr1d1/Ppara/Nr1i2/Nr4a2/Rorc/Clock/Smarca4/Kank2/Arntl/Ntrk2	17
BP	GO:0034976	response to endoplasmic reticulum stress	21/1014	204/20432	0.00127812	0.0104534	Psmc3/Dnajb9/Psmc5/Eif2ak2/Rhbdd1/Atf3/Tor1a/Vcp/Sesn2/Casp9/Psmc2/Psmc4/Anks4b/Aars/Parp16/Thbs1/Scamp5/Pik3r1/Usp14/Trp53/Nck2	21
BP	GO:0072593	reactive oxygen species metabolic process	23/1014	232/20432	0.00128265	0.0104534	Por/Cav1/Plin5/Pdk4/Pxdn/Dhfr/Plau/Cbs/Sirt3/Sesn2/Slc25a33/Nox4/Slc7a2/Birc3/Dnm2/Gadd45a/Thbs1/Zc3h12a/Pla2r1/Immp2l/Ptk2b/Trp53/Bnip3	23
BP	GO:0006805	xenobiotic metabolic process	8/1014	44/20432	0.00128895	0.0104534	Nr1i2/Gsto1/Gstm4/Rorc/Sult1b1/Cyp2b10/Sult1a1/Fmo2	8
BP	GO:1903317	regulation of protein maturation	10/1014	65/20432	0.00129297	0.0104534	Prkaca/Fuz/Myh9/Rhbdd1/Cd55/Birc3/Serpine1/Thbs1/Ctla2a/Angptl8	10
BP	GO:0071333	cellular response to glucose stimulus	13/1014	100/20432	0.00132783	0.0104534	Prkaca/Nr1d1/Gpld1/Hmgcr/Map4k4/Mpc2/Atg7/Nox4/Stx4a/Smarca4/Prkce/Lepr/Mup1	13
BP	GO:0015849	organic acid transport	15/1014	125/20432	0.00134975	0.0105749	Slc3a2/Slc25a13/Slc25a22/Arg1/Slc1a4/Slc36a1/Slc10a2/Abcb11/Slc27a2/Slc27a5/Aqp8/Slc7a2/Slc38a7/Slc7a5/Thbs1	15
BP	GO:0051259	protein oligomerization	40/1014	489/20432	0.00139875	0.0119084	Srr/Nacc1/Angptl4/Cav1/Mlkl/Bik/Arg1/Micu1/Hmgcr/Hacl1/Chrna2/Cldn1/App/Cutc/Tk1/Acadl/Farsb/Tor1b/Tor1a/Cth/Vcp/Prkab1/Tnfrsf1a/Qprt/Kctd13/Parva/Oat/Birc3/Sigmar1/Tgm2/S100a10/Acacb/Ikbke/Dctpp1/Zc3h12a/Ide/Npm1/Trp53/Uqcrh/Rnf213	40
BP	GO:0034754	cellular hormone metabolic process	11/1014	77/20432	0.00141143	0.0127002	Cyp17a1/Stat5b/Rbp4/Bmp2/Schip1/Hsd17b11/Sult1a1/Hsd17b2/Akr1d1/Bmp6/Retsat	11
BP	GO:0097006	regulation of plasma lipoprotein particle levels	9/1014	55/20432	0.00142942	0.0128387	Abca1/Gpld1/Gpihbp1/Apoa5/Ldlr/Mylip/Pcsk9/Ces1d/Ces1g	9
BP	GO:0061614	pri-miRNA transcription from RNA polymerase II promoter	6/1014	26/20432	0.00144005	0.0132519	Fos/Tert/Ppara/Bmp2/Ets1/Smarca4	6
BP	GO:1901653	cellular response to peptide	21/1014	206/20432	0.00144459	0.0132519	Kat2b/Sp1/Cav1/Rarres2/Pdk4/Sgk1/Srebf1/Stat5b/Gpld1/Rangap1/Rela/Baiap2/Cpeb1/Nr4a2/Slc25a33/Pik3r1/Serpina12/Gck/Shc1/Pcsk9/Prkca	21
BP	GO:0032102	negative regulation of response to external stimulus	25/1014	263/20432	0.00146643	0.0134805	Lgals9/Dhx58/Hmgcr/Plau/Ppara/Hrg/Pdgfa/Fcgr2b/Sema4a/Tnfrsf1a/Bbs2/Ets1/Kank2/Trib1/Ryk/Serpine1/Metrnl/Thbs1/Mvk/Adora1/Zc3h12a/Ctla2a/Cx3cr1/Calcrl/Cnr2	25
BP	GO:0042537	benzene-containing compound metabolic process	5/1014	18/20432	0.0014856	0.0143604	Kynu/Gstm4/Cyp4b1/Kyat1/Kyat3	5
BP	GO:0045723	positive regulation of fatty acid biosynthetic process	5/1014	18/20432	0.0014856	0.0143842	Mid1ip1/Avpr1a/Srebf1/Slc45a3/Apoa5	5
BP	GO:0071281	cellular response to iron ion	4/1014	11/20432	0.00150289	0.0143842	Gpld1/Hrg/Slc40a1/Bmp6	4
BP	GO:2000322	regulation of glucocorticoid receptor signaling pathway	4/1014	11/20432	0.00150289	0.0143842	Cry1/Clock/Arntl/Ntrk2	4
CC	GO:0005753	mitochondrial proton-transporting ATP synthase complex	5/1029	18/20678	0.00150382	0.0345668	Atp5g3/Atp5c1/Atp5l/Atp5k/Usmg5	5
BP	GO:0001503	ossification	32/1014	368/20432	0.00155159	0.0143842	Sp1/Smo/Rps11/Prkaca/Bmp7/Atraid/Igfbp3/Gpld1/Id4/Lect1/Mtss1/Cbs/Fasn/Nab2/Igfbp5/Sp3/Bmp2/Adar/Lmna/Psmc2/Fgfr1/P2ry2/Cebpa/Bmp6/Junb/Fgfr3/Col13a1/Ptk2b/Acvr2b/Sort1/Mn1/Jund	32
BP	GO:0009755	hormone-mediated signaling pathway	19/1014	180/20432	0.00159054	0.0143842	Daxx/Calr/Phb2/Nr1i3/Bmp7/Sgk1/Cry1/Ncoa1/Nr1d1/Stat5b/Ppara/Nr1i2/Nr4a2/Rorc/Clock/Smarca4/Kank2/Arntl/Ntrk2	19
MF	GO:0042562	hormone binding	11/1012	78/20358	0.00159159	0.0498506	Calr/Galr3/Avpr1a/Slc40a1/Lrp2/Serpina7/Ctsh/Pik3r1/Shc1/Ide/Lepr	11
BP	GO:0071326	cellular response to monosaccharide stimulus	13/1014	102/20432	0.00159484	0.0143842	Prkaca/Nr1d1/Gpld1/Hmgcr/Map4k4/Mpc2/Atg7/Nox4/Stx4a/Smarca4/Prkce/Lepr/Mup1	13
BP	GO:0071331	cellular response to hexose stimulus	13/1014	102/20432	0.00159484	0.0150349	Prkaca/Nr1d1/Gpld1/Hmgcr/Map4k4/Mpc2/Atg7/Nox4/Stx4a/Smarca4/Prkce/Lepr/Mup1	13
BP	GO:0009116	nucleoside metabolic process	27/1014	294/20432	0.00160918	0.0150349	Slc25a13/Atp5g3/Atp6v0a1/Galk1/Hmgcr/Ndufb9/Ppara/Tymp/Ndufb8/Tk1/Atp5c1/Ahcy/Vcp/Gale/Slc25a33/Dck/Ahcyl2/Nudt7/Acpp/Galt/Atp5l/Gck/Atp5k/Trp53/Uqcrh/Mocs1/Macrod2	27
BP	GO:0034330	cell junction organization	20/1014	194/20432	0.00161873	0.0151638	Prkaca/Cav1/Ocln/Mtss1/Cldn1/Plec/Ptprj/Pard3/Nfasc/Cdh5/Cldn5/S100a10/Fmn1/Plekha7/Whamm/Gjb2/Prkca/Ptk2b/Afdn/Rap1a	20
BP	GO:0015748	organophosphate ester transport	10/1014	67/20432	0.0016383	0.0156612	Abca1/Abca2/Atp9a/Slc25a33/Atp11a/Apoa5/Ldlr/Atp8b1/Abcb4/G6pc	10
MF	GO:0005506	iron ion binding	18/1012	167/20358	0.00167985	0.0498506	Cyp51/Cyp17a1/Calr/Cyp39a1/Cyp2u1/Cyp4b1/Cyp2b10/Msmo1/Sc5d/Cyp2c37/Agmo/Cyp2c50/Cyp3a11/Ethe1/Aox3/Cyp4a12a/Cyp2c54/Cyp2d10	18
BP	GO:0034329	cell junction assembly	17/1014	154/20432	0.00169434	0.0157459	Prkaca/Cav1/Ocln/Cldn1/Plec/Ptprj/Pard3/Nfasc/Cdh5/Cldn5/S100a10/Fmn1/Whamm/Gjb2/Prkca/Ptk2b/Rap1a	17
BP	GO:0006575	cellular modified amino acid metabolic process	15/1014	128/20432	0.0017152	0.0159036	Dhfr/Serinc2/Gsto1/Gstm4/Gclm/Cth/Mthfr/Sult1b1/Mthfd2l/Nat8/Gstt2/Ggt6/Ethe1/Mthfs/Ggh	15
BP	GO:0071359	cellular response to dsRNA	8/1014	46/20432	0.00173869	0.0159613	Cav1/Tert/Adar/Zc3hav1/Rbm3/Ifit1/Zc3h12a/Npm1	8
BP	GO:0071453	cellular response to oxygen levels	12/1014	91/20432	0.00177286	0.0162786	Aqp1/Cav1/Tert/Bnip3l/Cbs/Cpeb1/Gngt1/Atg7/Cited2/Prkce/Trp53/Bnip3	12
BP	GO:0070670	response to interleukin-4	6/1014	27/20432	0.00177467	0.0164052	Mcm2/Stat5b/Fasn/Mrc1/Jak3/Nfil3	6
BP	GO:0015672	monovalent inorganic cation transport	35/1014	418/20432	0.00183342	0.0173363	Aqp1/Atp4a/Slc5a6/Cav1/Sgk2/Atp5g3/Slc22a5/Atp6v0a1/Sgk1/Slc36a1/Slc17a1/Slc10a2/Slc23a1/Atp5c1/Slc20a1/Asic5/Atp6v0d2/Prss8/Wwp2/Ank2/Dnm2/Kcnk10/Slc17a2/Slc38a7/Mfsd4b1/Atp5l/Ptpn3/Gck/Adora1/Pcsk9/Kcnk6/Atp5k/Kcnn2/Ptk2b/Ank3	35
BP	GO:0048660	regulation of smooth muscle cell proliferation	15/1014	129/20432	0.00185401	0.0174084	Cav1/Igfbp3/Nampt/Stat5b/Tert/Hmgcr/Igfbp5/Xrcc5/Trib1/Tgm2/Pik3r1/Shc1/Prkca/Trp53/Calcrl	15
BP	GO:1901657	glycosyl compound metabolic process	28/1014	312/20432	0.0018746	0.0175254	Slc25a13/Atp5g3/Atp6v0a1/Galk1/Hmgcr/Ndufb9/Ppara/Tymp/Ndufb8/Tk1/Atp5c1/Ahcy/Vcp/Gale/Slc25a33/Dck/Ahcyl2/Abcg2/Nudt7/Acpp/Galt/Atp5l/Gck/Atp5k/Trp53/Uqcrh/Mocs1/Macrod2	28
BP	GO:0000028	ribosomal small subunit assembly	5/1014	19/20432	0.00193453	0.0180161	Rps5/Rps14/Pwp2/Rps28/Rps27	5
BP	GO:0035384	thioester biosynthetic process	5/1014	19/20432	0.00193453	0.0180161	Pdk4/Acly/Mpc2/Acacb/Mlycd	5
BP	GO:0071616	acyl-CoA biosynthetic process	5/1014	19/20432	0.00193453	0.0181601	Pdk4/Acly/Mpc2/Acacb/Mlycd	5
BP	GO:0032869	cellular response to insulin stimulus	17/1014	156/20432	0.00194773	0.0181601	Kat2b/Sp1/Rarres2/Pdk4/Sgk1/Srebf1/Gpld1/Rela/Baiap2/Cpeb1/Slc25a33/Pik3r1/Serpina12/Gck/Shc1/Pcsk9/Prkca	17
BP	GO:0008652	cellular amino acid biosynthetic process	8/1014	47/20432	0.00200575	0.0181601	Dhfr/Cbs/Agxt/Cth/Mthfr/Mthfd2l/Asns/Bhmt	8
BP	GO:0042632	cholesterol homeostasis	10/1014	69/20432	0.00205476	0.0182033	Cav1/Abca1/Nr1d1/Srebf2/Gpihbp1/Apoa5/Ldlr/Mylip/Pcsk9/G6pc	10
BP	GO:0055092	sterol homeostasis	10/1014	69/20432	0.00205476	0.0183818	Cav1/Abca1/Nr1d1/Srebf2/Gpihbp1/Apoa5/Ldlr/Mylip/Pcsk9/G6pc	10
BP	GO:0009086	methionine biosynthetic process	4/1014	12/20432	0.00216625	0.0188238	Cth/Mthfr/Mthfd2l/Bhmt	4
BP	GO:0045899	positive regulation of RNA polymerase II transcriptional preinitiation complex assembly	4/1014	12/20432	0.00216625	0.0188238	Psmc3/Psmc5/Psmc2/Psmc4	4
CC	GO:0008540	proteasome regulatory particle, base subcomplex	4/1029	12/20678	0.00218812	0.0351734	Psmc3/Psmc5/Psmc2/Psmc4	4
BP	GO:0035773	insulin secretion involved in cellular response to glucose stimulus	10/1014	70/20432	0.00229282	0.019036	Nr1d1/Gpld1/Hmgcr/Map4k4/Mpc2/Atg7/Stx4a/Prkce/Lepr/Mup1	10
BP	GO:0071466	cellular response to xenobiotic stimulus	8/1014	48/20432	0.00230406	0.0193729	Nr1i2/Gsto1/Gstm4/Rorc/Sult1b1/Cyp2b10/Sult1a1/Fmo2	8
BP	GO:0022600	digestive system process	12/1014	94/20432	0.00234353	0.0195952	Aqp1/Slc22a5/Pbld1/Acat2/Rbp4/Copa/Abcg2/Apoa5/Ldlr/Ireb2/Abcb1a/Vamp8	12
BP	GO:0032922	circadian regulation of gene expression	9/1014	59/20432	0.00236732	0.020714	Cry1/Nampt/Nr1d1/Ppara/Rorc/Clock/Bhlhe41/Ciart/Arntl	9
BP	GO:0019674	NAD metabolic process	7/1014	38/20432	0.00237435	0.0214833	Nampt/Nadk2/Kynu/Vcp/Qprt/Nmnat3/Trp53	7
BP	GO:0046503	glycerolipid catabolic process	7/1014	38/20432	0.00237435	0.021728	Lipe/Plin5/Gpld1/Abhd6/Apoa5/Pnpla3/Ces1d	7
CC	GO:0045259	proton-transporting ATP synthase complex	5/1029	20/20678	0.00250485	0.035626	Atp5g3/Atp5c1/Atp5l/Atp5k/Usmg5	5
CC	GO:0005838	proteasome regulatory particle	5/1029	21/20678	0.00315448	0.0357536	Psmc3/Psmc5/Psmd14/Psmc2/Psmc4	5
CC	GO:0043296	apical junction complex	14/1029	124/20678	0.00348558	0.0360065	Esam/Cyth1/Ocln/Cldn1/Nectin3/Pard3/Mpdz/Cdh5/Ddx58/Cldn5/Plekha7/Cldn2/Afdn/Ank3	14
